# Supplementary material for: Tuning of the HOMO–LUMO gap of donor-substituted symmetrical and unsymmetrical benzothiadiazoles
Source: Royal Society of Chemistry journal article supplement (doi:10.1039/c4ob00629a), 2014-01-01
Supplement: c4ob00629a1.pdf [file c4ob00629a1.pdf]

# **Tuning of the HOMO-LUMO Gap of Donor-Substituted Symmetrical and Unsymmetrical Benzothiadiazoles**

**Rajneesh Misra\* and Prabhat Gautam**

Department of Chemistry,  
Indian Institute of Technology Indore,  
Indore- 452017, India.

rajneeshmisra@iiti.ac.in

## **Table of Contents**

|                                                                                                      |            |
|------------------------------------------------------------------------------------------------------|------------|
| <b>I. Copies of <sup>1</sup>H NMR, <sup>13</sup>C NMR and HRMS Spectra of the New Compounds.....</b> | <b>S2</b>  |
| <b>II. Emission Data for BTD 5 and 6 .....</b>                                                       | <b>S22</b> |
| <b>III. Electrochemical Data for BTD 5–12 .....</b>                                                  | <b>S23</b> |
| <b>IV. Thermogravimetric analysis data for BTD 8, 10, 11 and 12 .....</b>                            | <b>S25</b> |
| <b>V. DFT and TD-DFT Calculations.....</b>                                                           | <b>S26</b> |

## I. Copies of $^1\text{H}$ NMR Spectra of the New Compounds

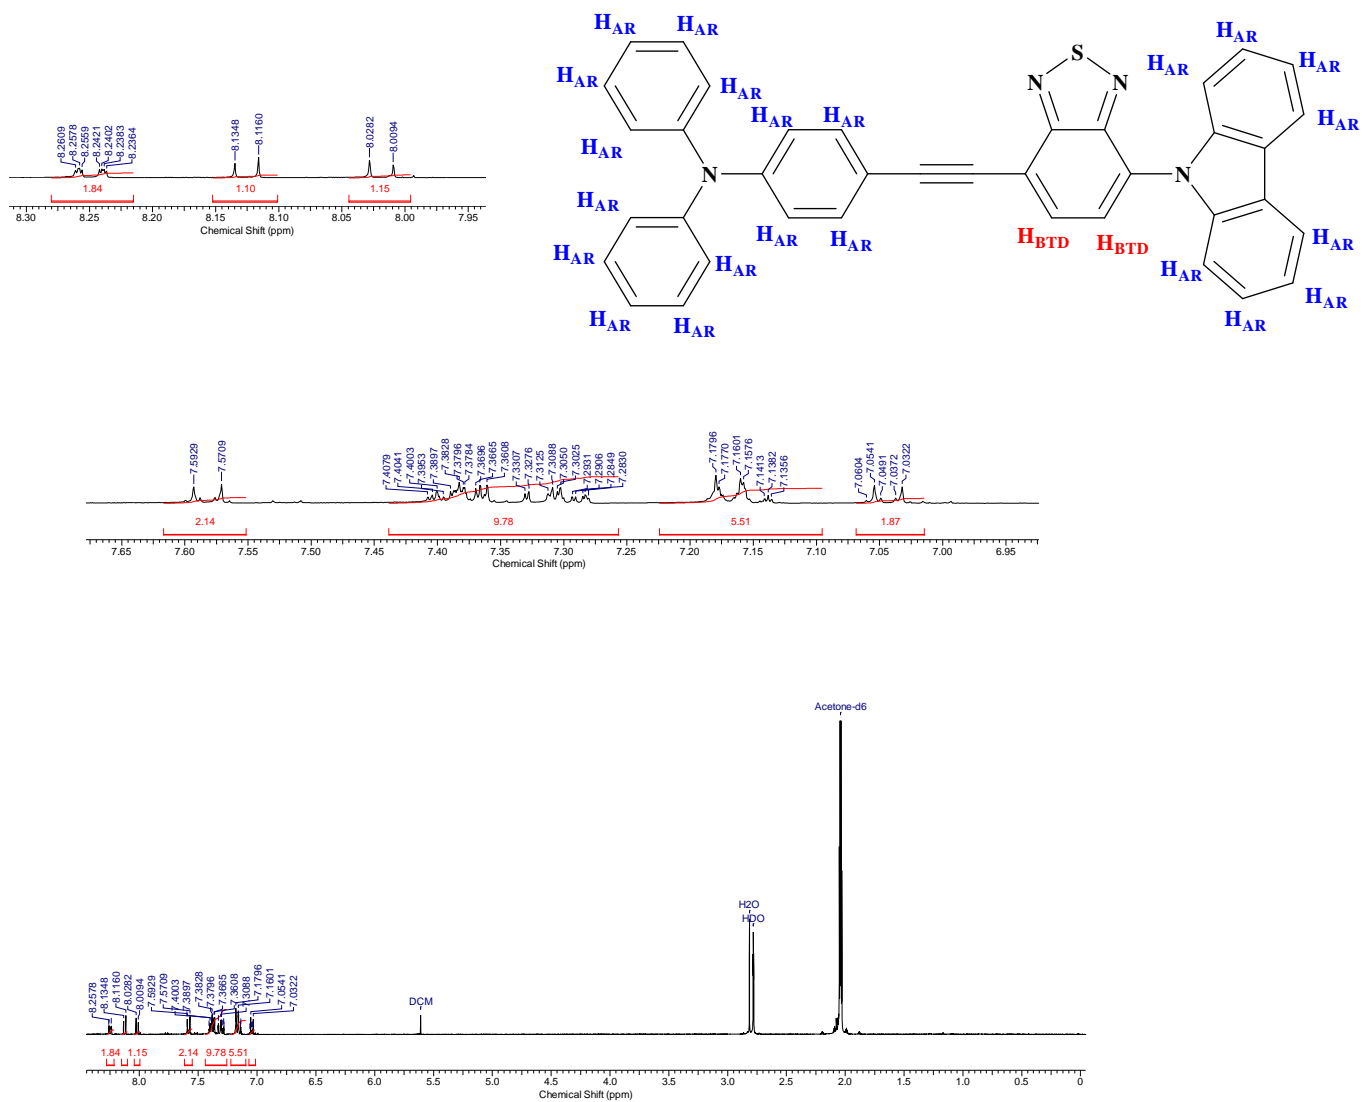

Figure S1.  $^1\text{H}$  NMR spectra of BTD 5

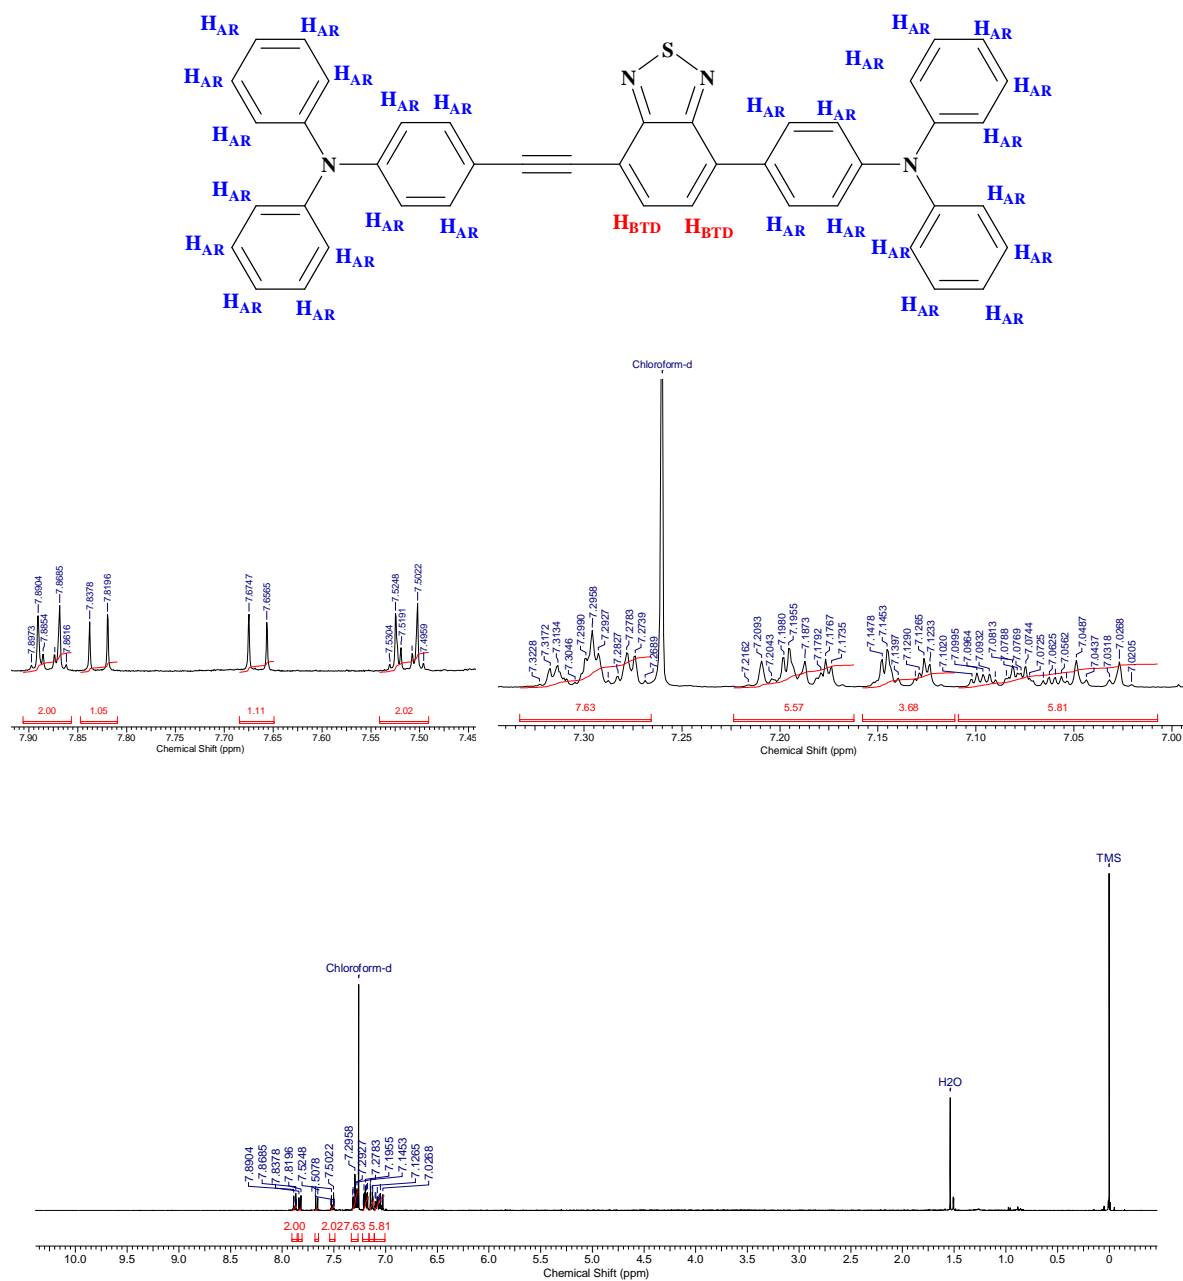

Figure S2. <sup>1</sup>H NMR spectra of BTD 6

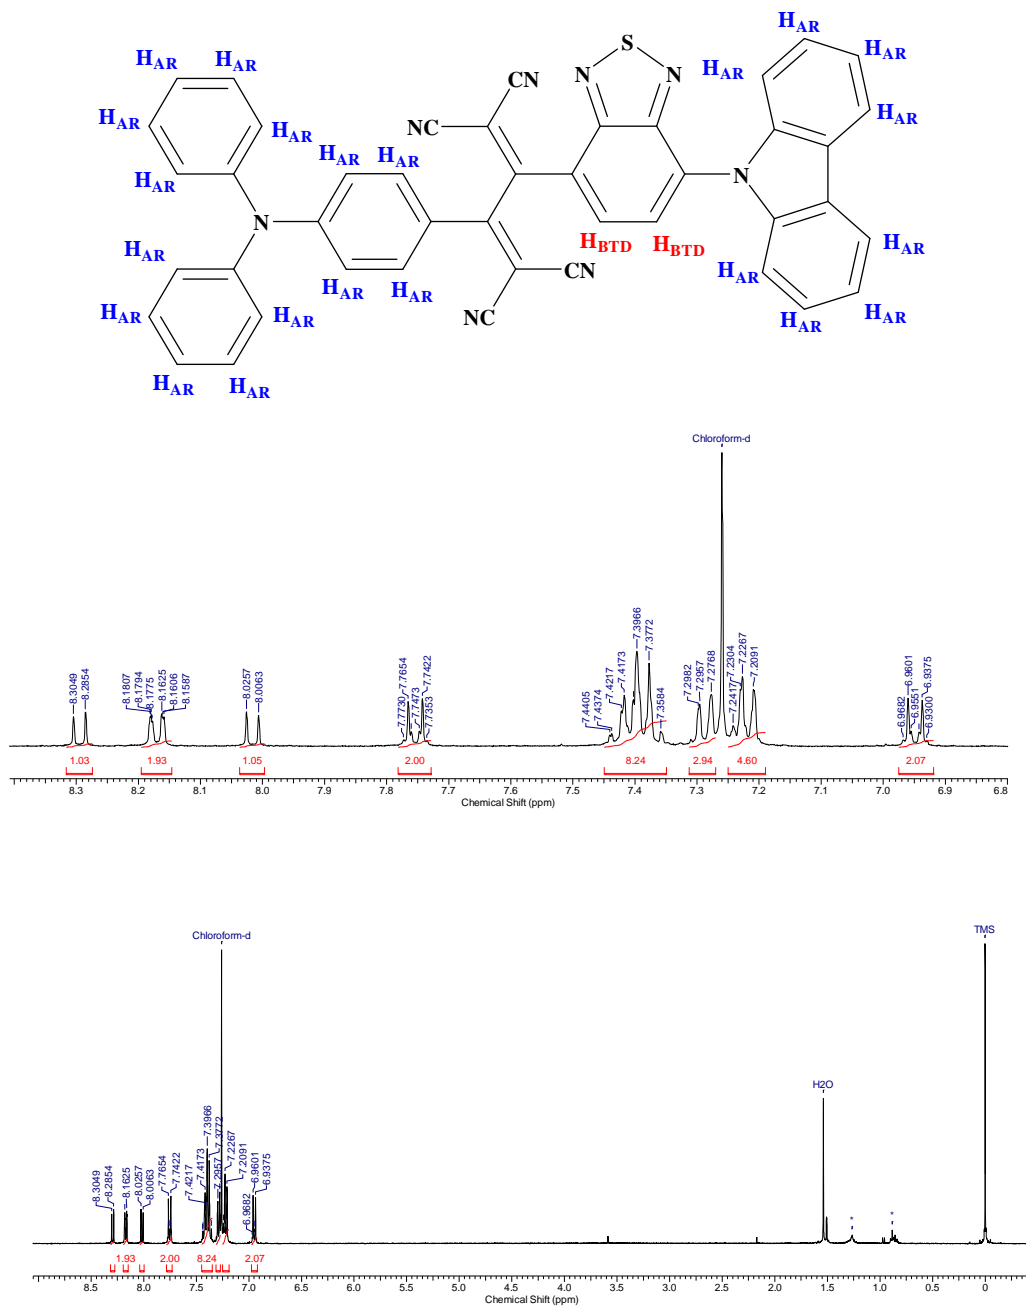

Figure S3.  $^1H$  NMR spectra of BTD 7

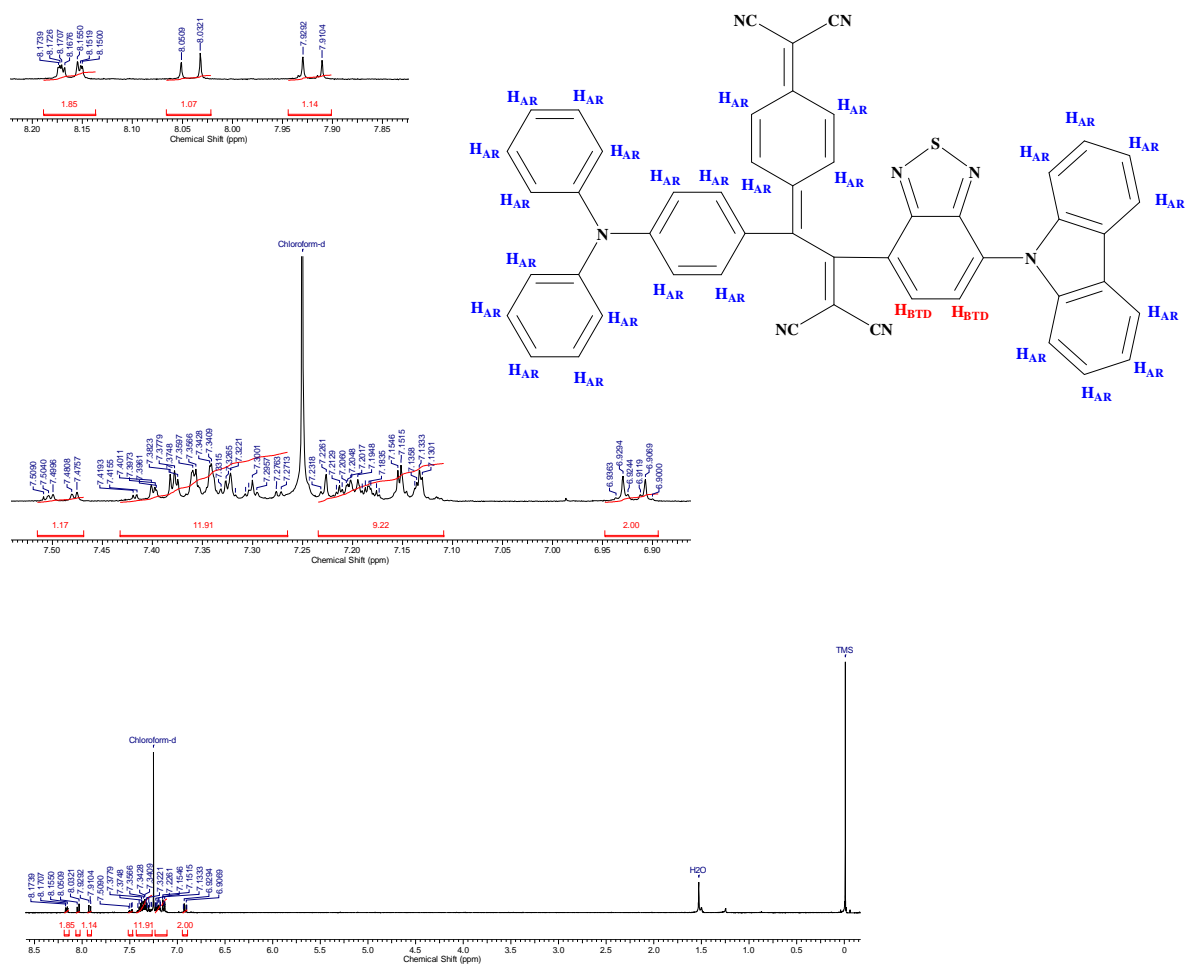

Figure S4.  $^1\text{H}$  NMR spectra of BTD 8

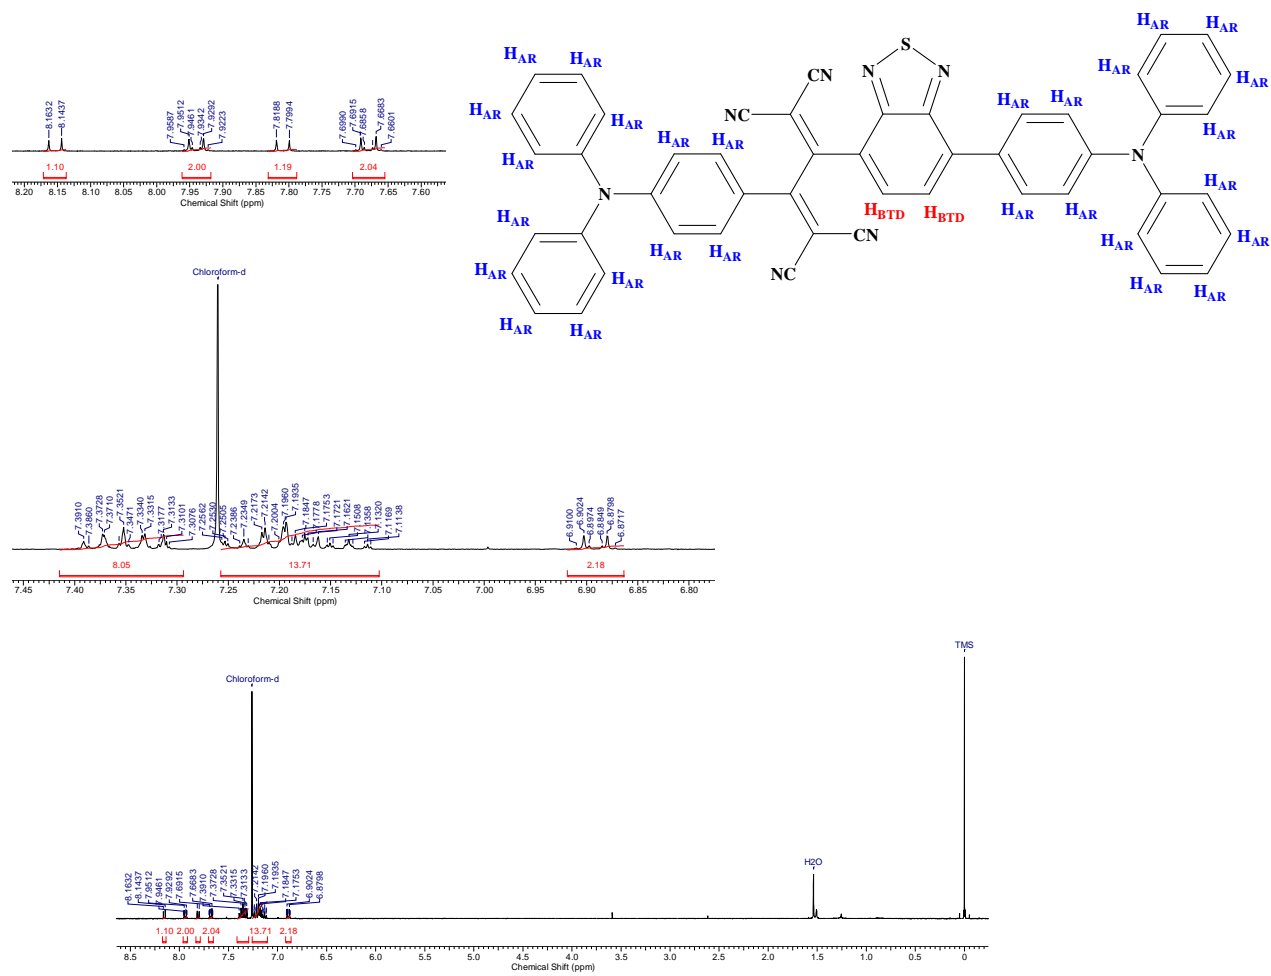

Figure S5.  $^1\text{H}$  NMR spectra of BTD 9

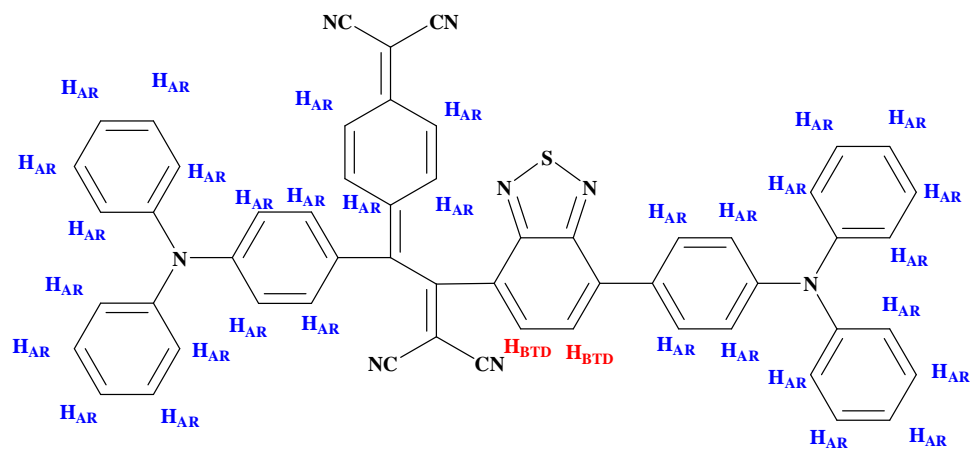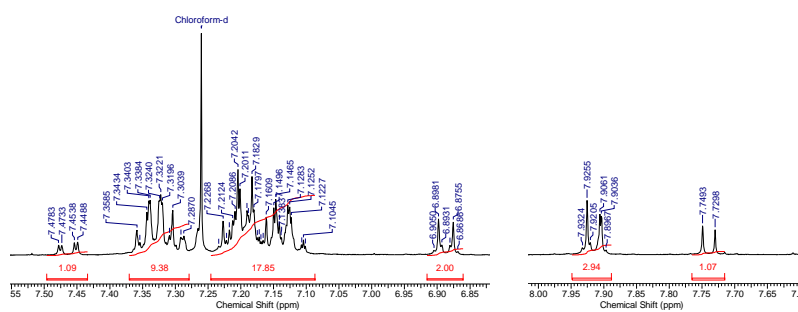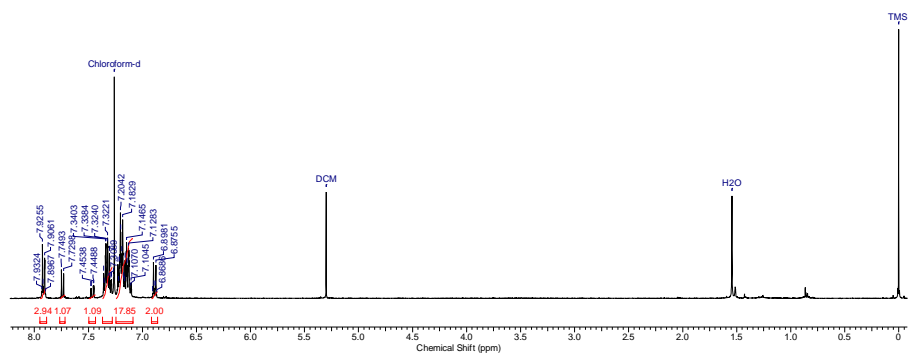

Figure S6.  $^1H$  NMR spectra of BTD 10

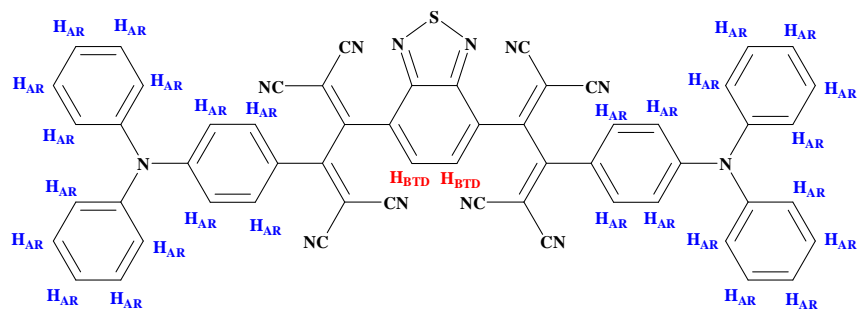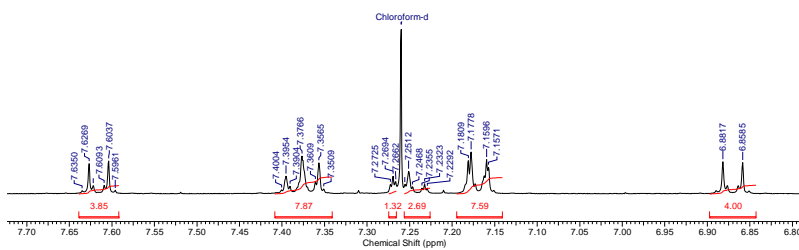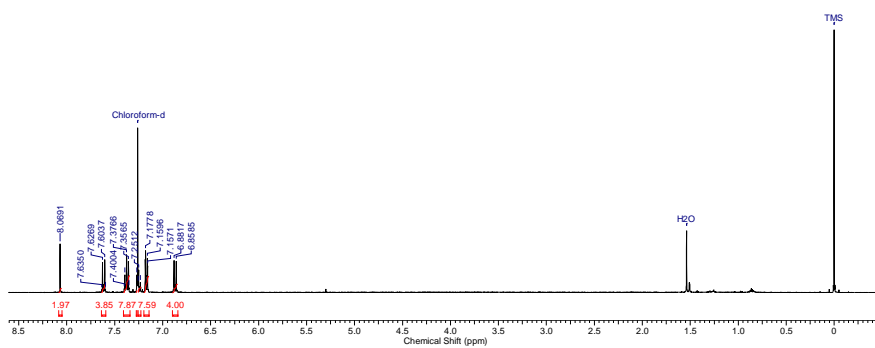

**Figure S7.**  $^1\text{H}$  NMR spectra of BTD 11



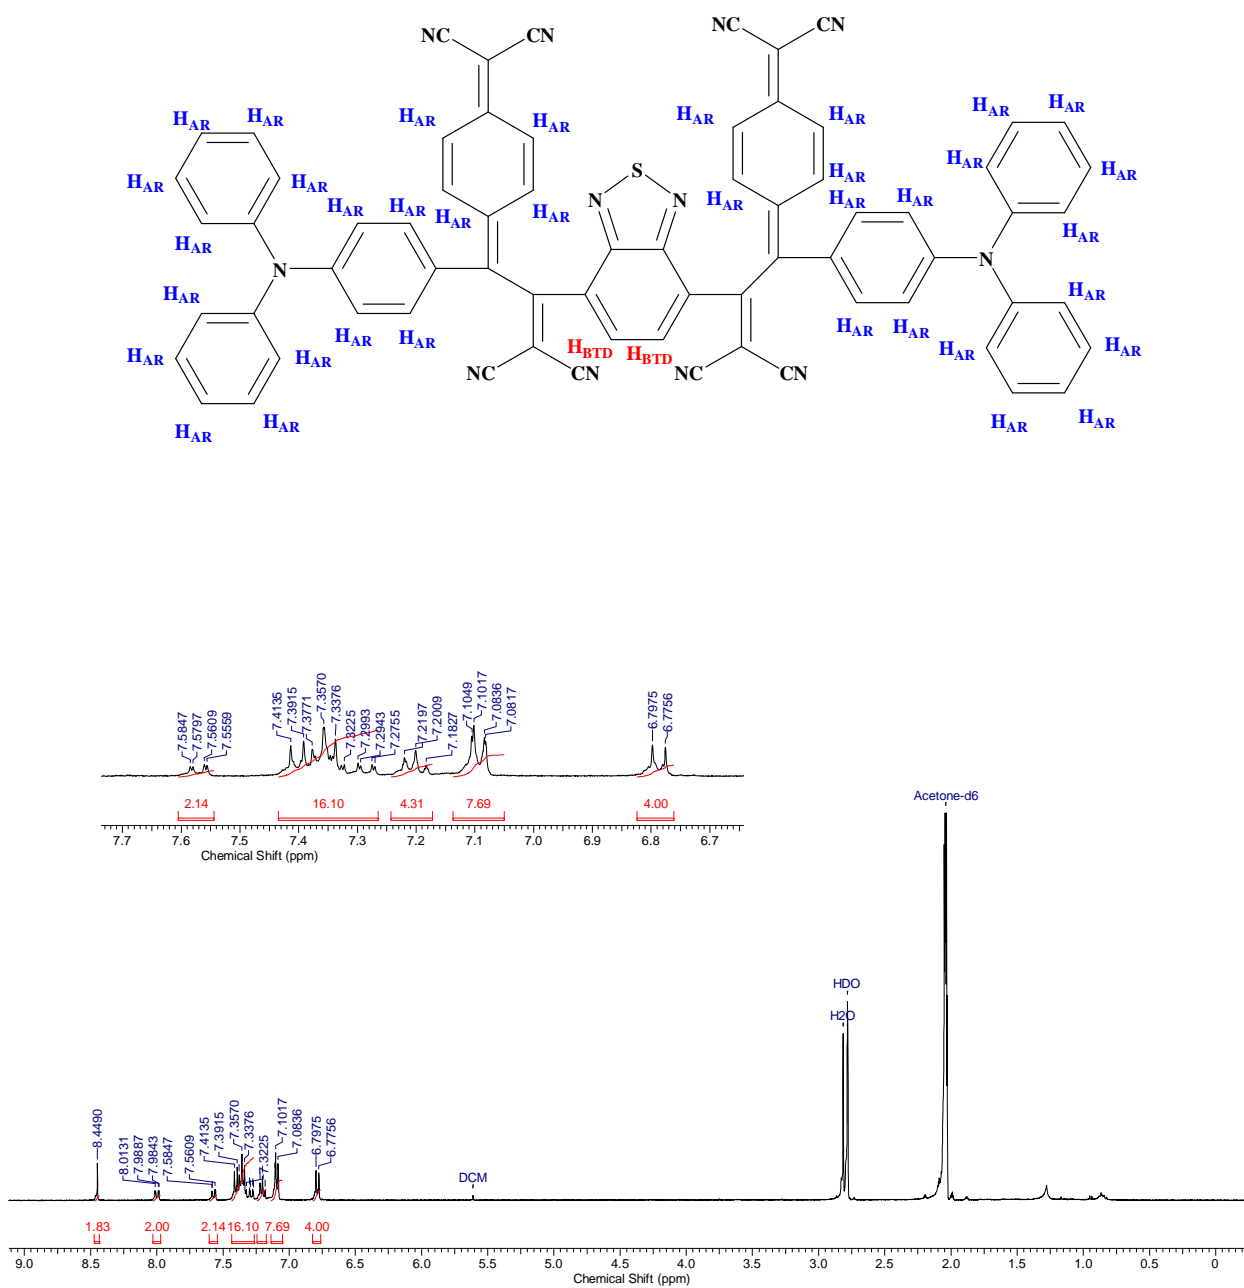

Figure S8.  $^1H$  NMR spectra of BTD 12

## Copies of $^{13}\text{C}$ NMR Spectra of the New Compounds

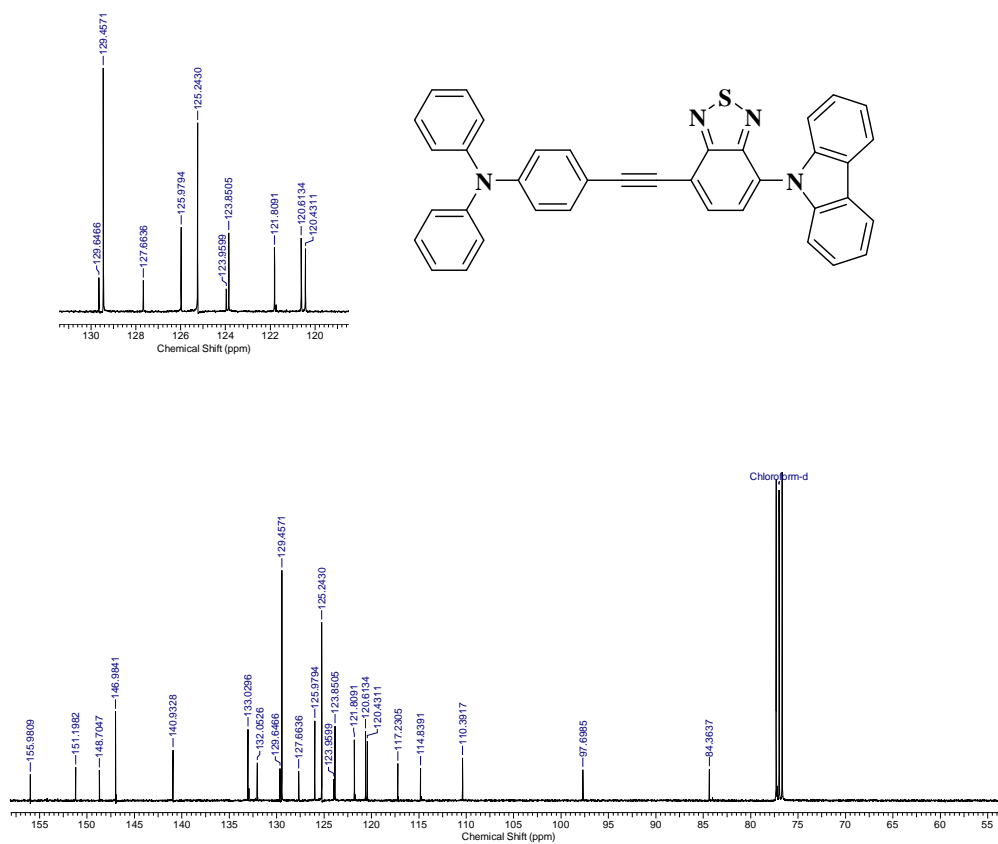

Figure S9.  $^{13}\text{C}$  NMR spectra of BTD 5

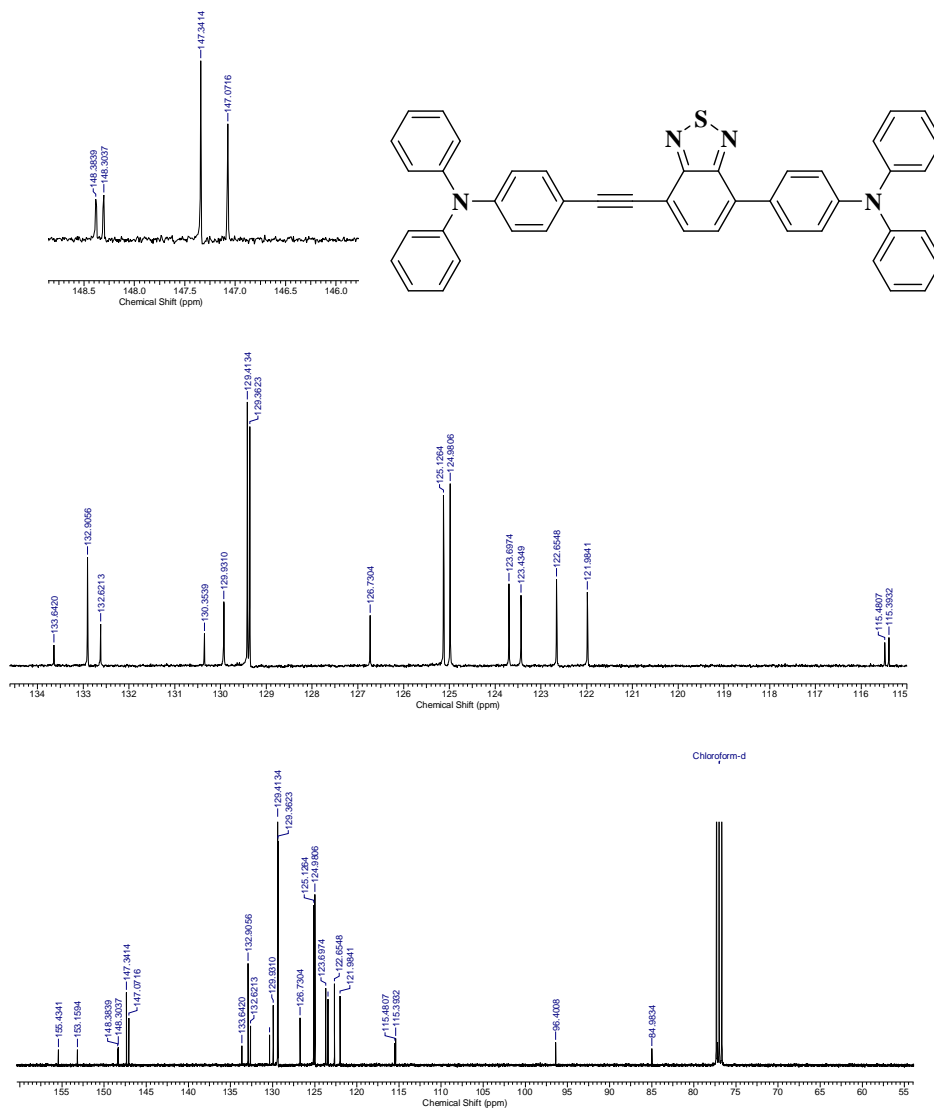

**Figure S10.**  $^{13}\text{C}$  NMR spectra of BTD 6

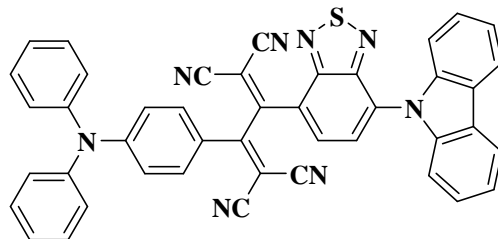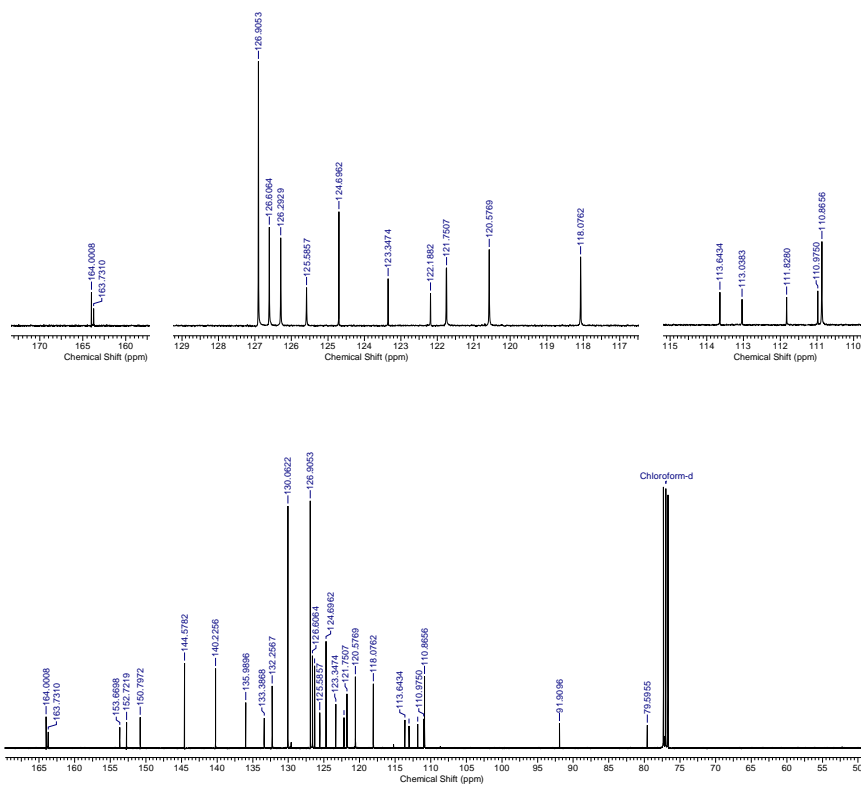

Figure S11.  $^{13}\text{C}$  NMR spectra of BTD 7

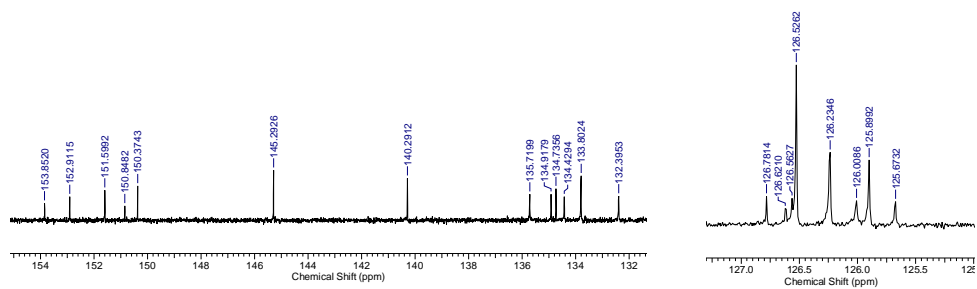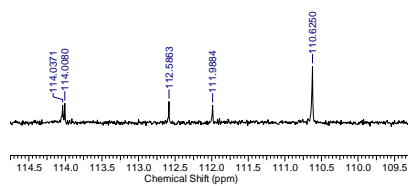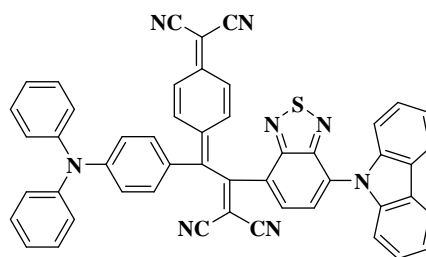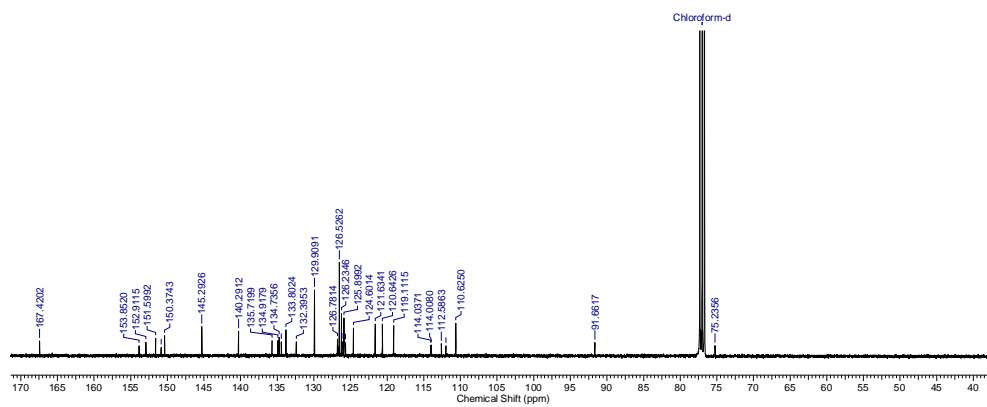

Figure S12. <sup>13</sup>C NMR spectra of **BTD 8**

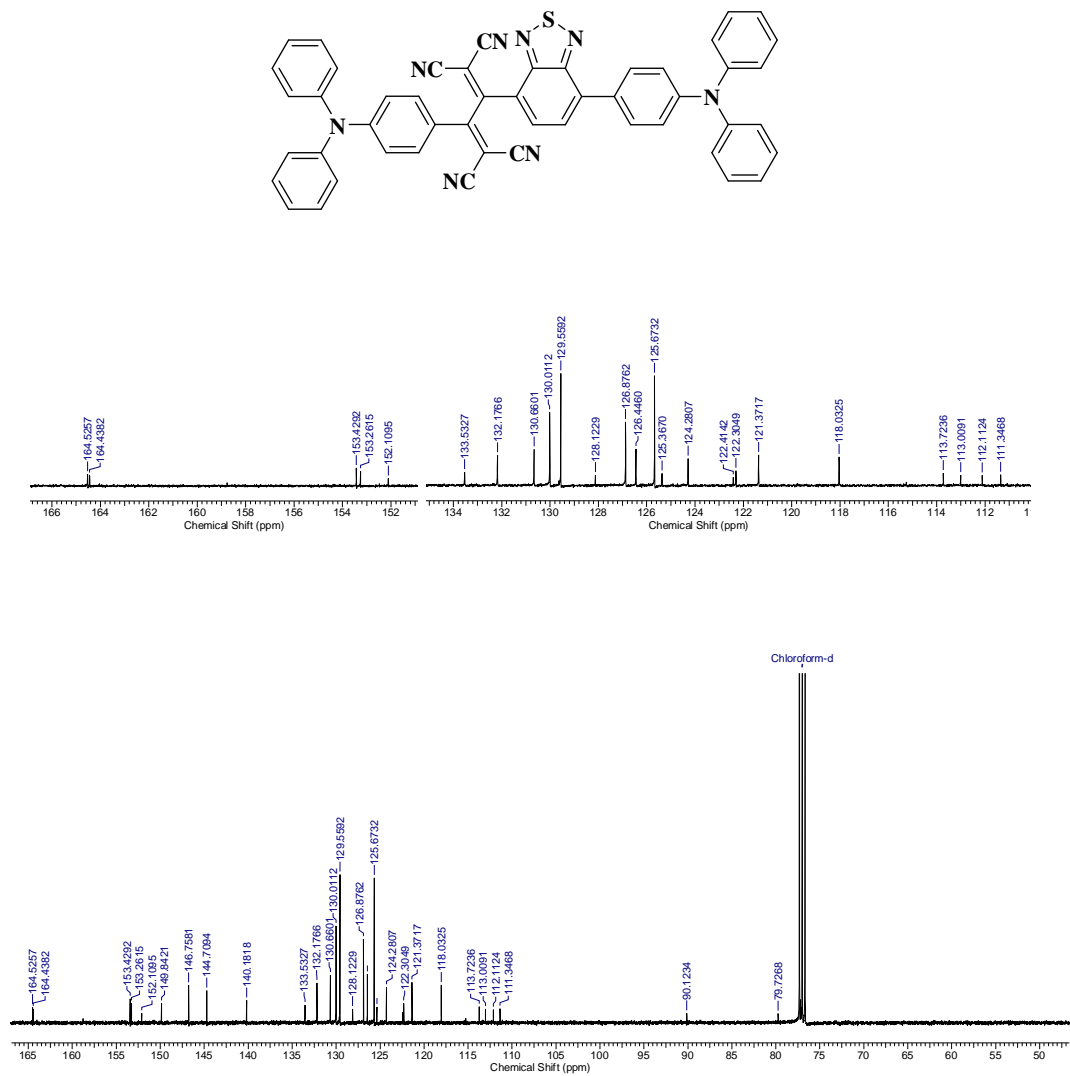

Figure S13. <sup>13</sup>C NMR spectra of BTD 9

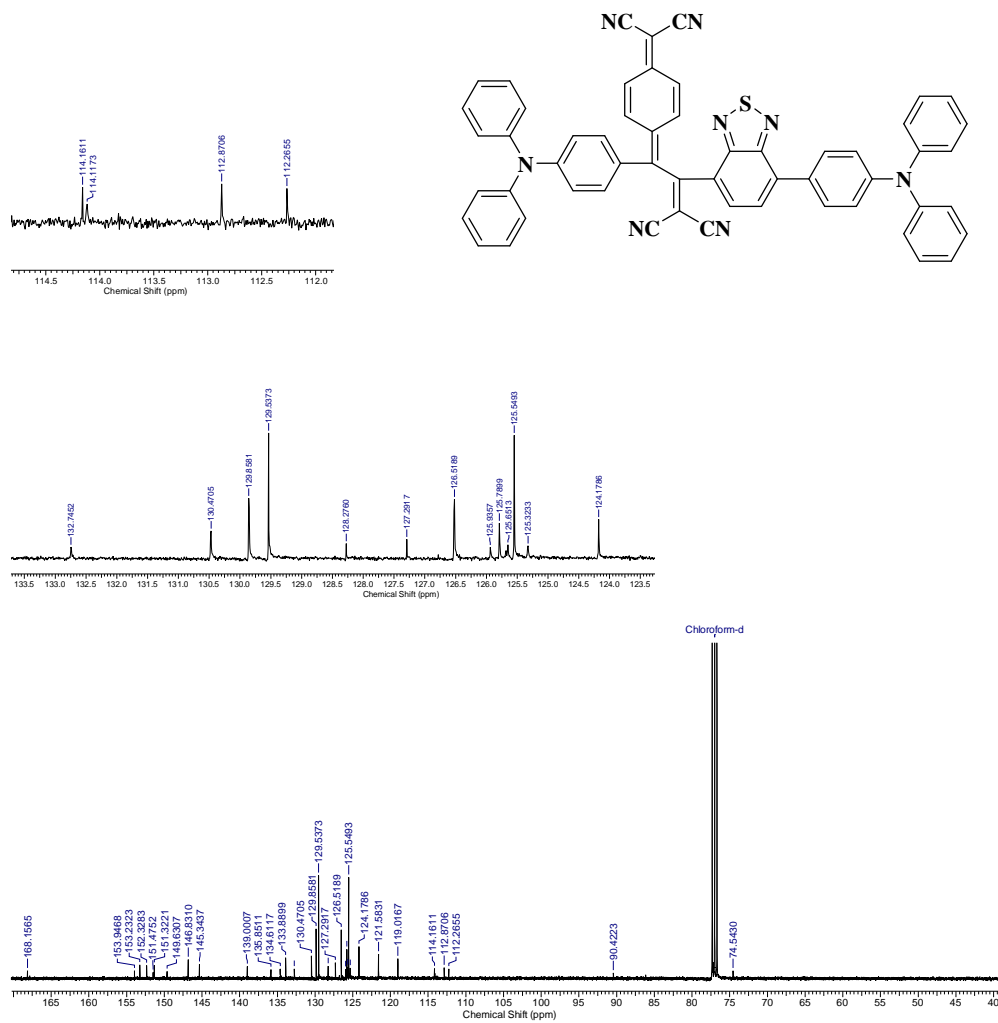

Figure S14. <sup>13</sup>C NMR spectra of BTD 10

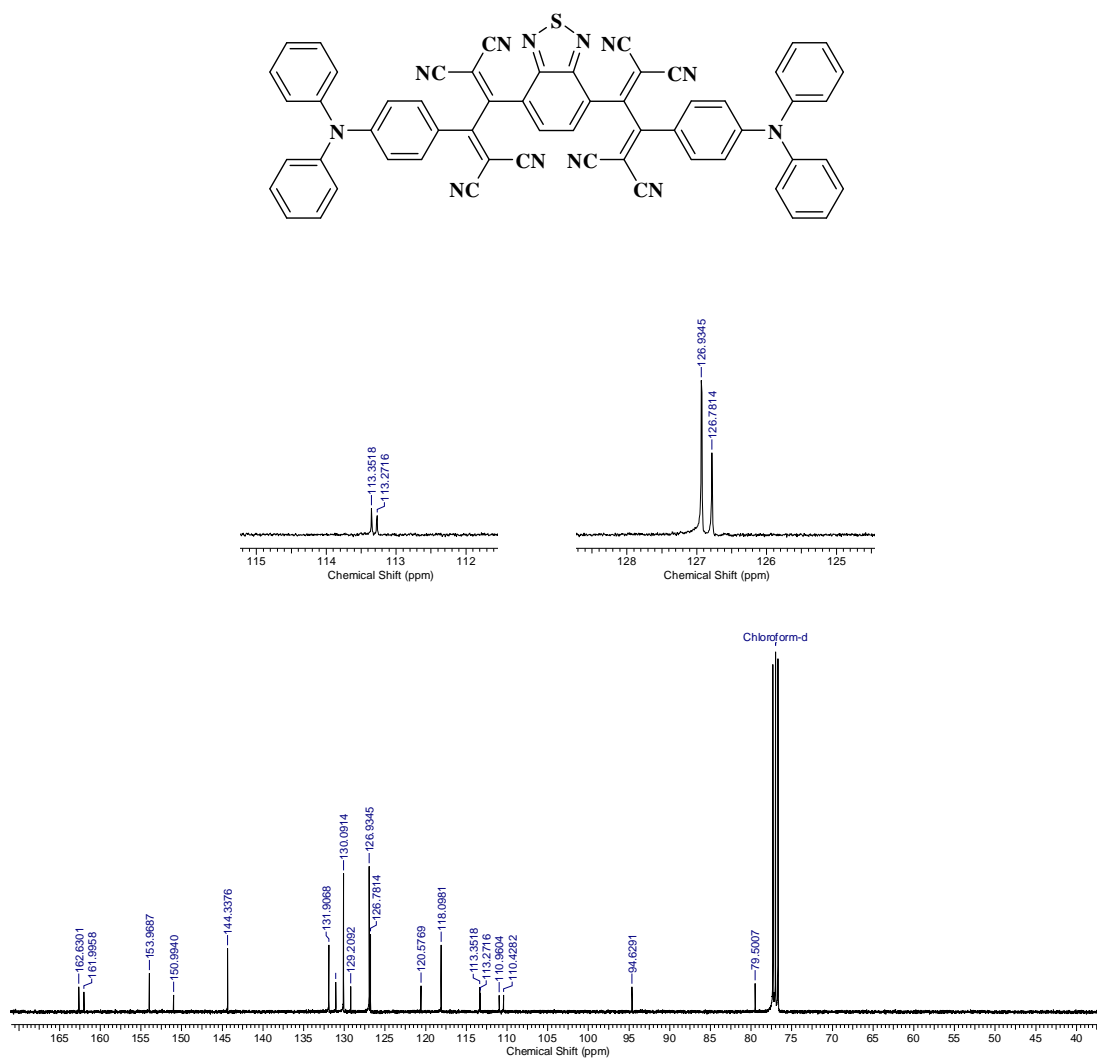

**Figure S15.**  $^{13}\text{C}$  NMR spectra of BTD 11



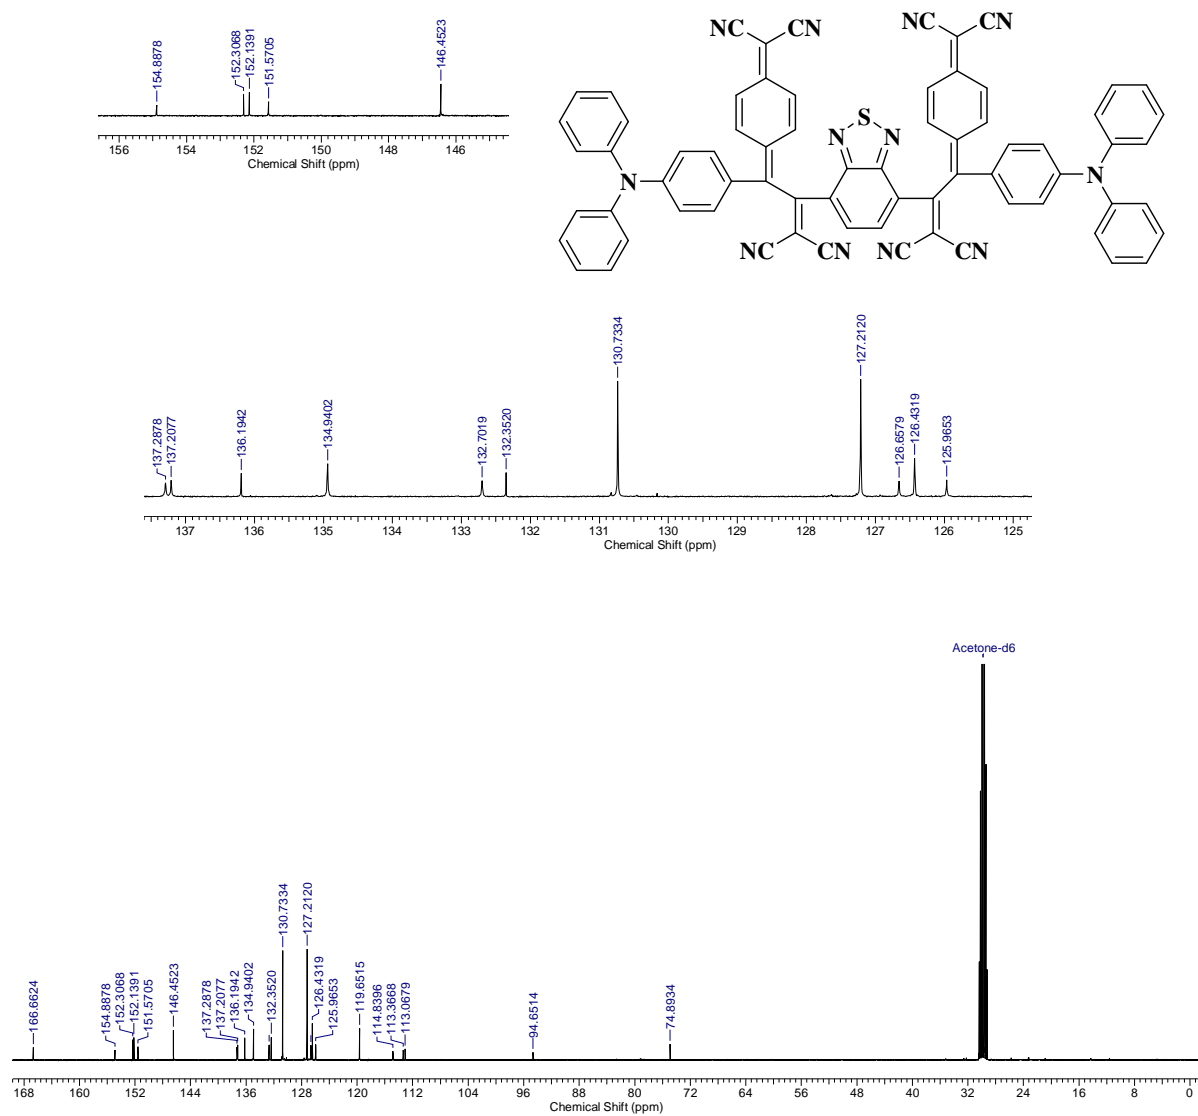

**Figure S16.**  $^{13}\text{C}$  NMR spectra of BTD 12

Copies of HRMS of new compounds.

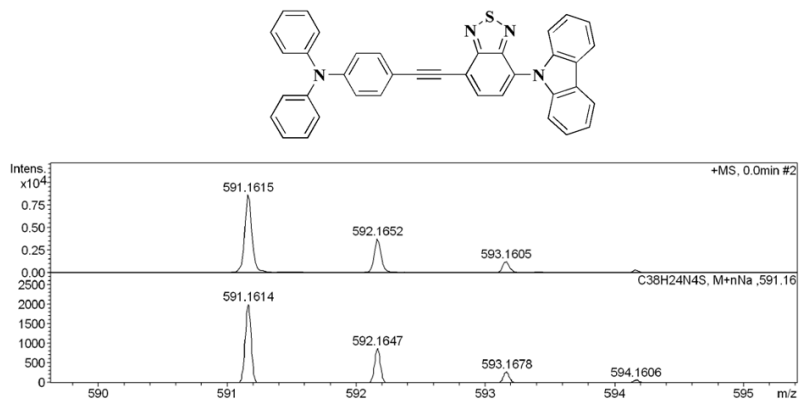

Figure S17. HRMS spectra of BTD 5

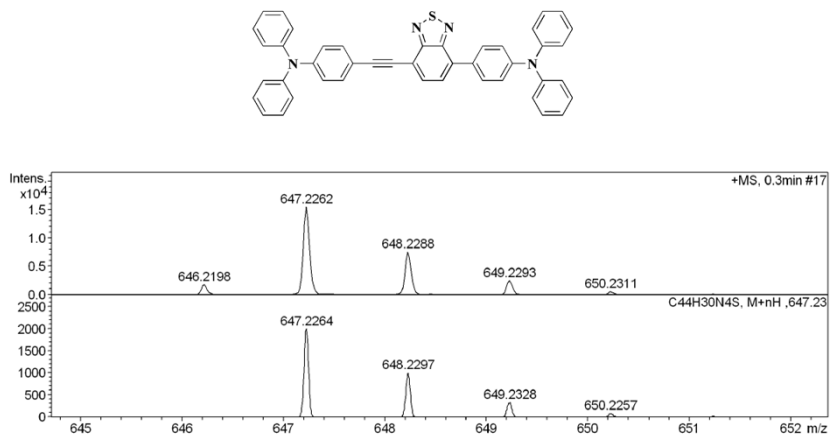

Figure S18. HRMS spectra of BTD 6

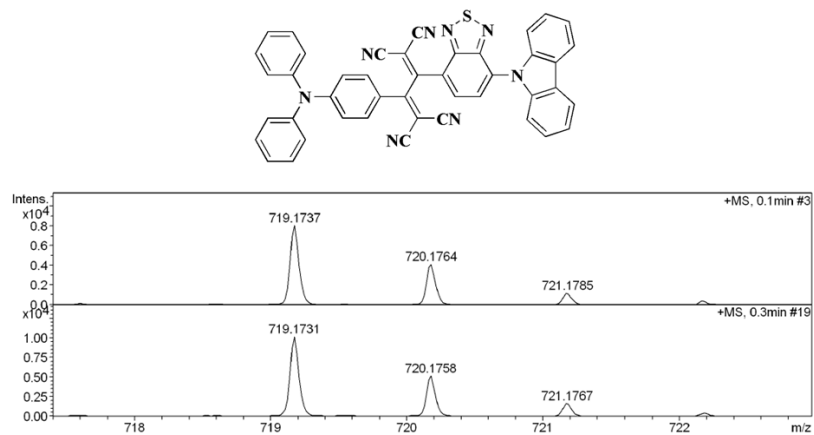

**Figure S19.** HRMS spectra of BT D 7

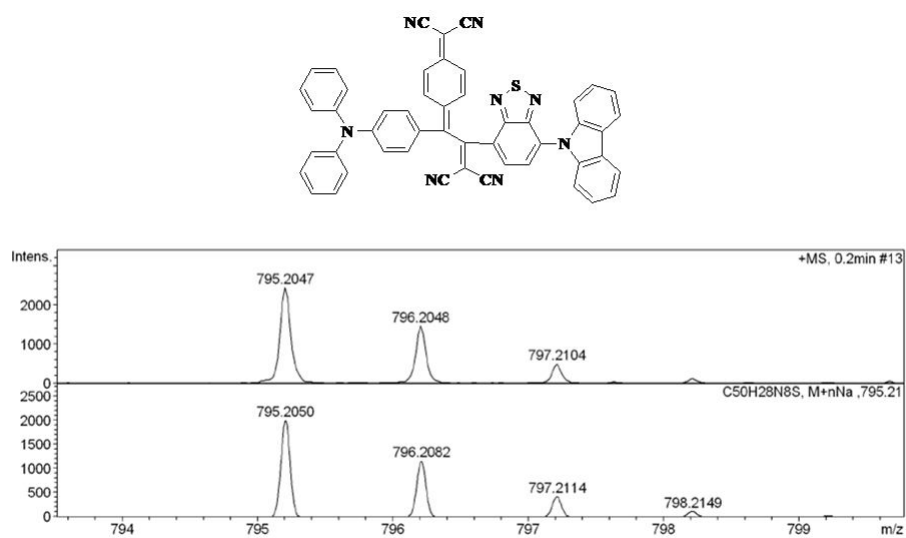

**Figure S20.** HRMS spectra of BT D 8

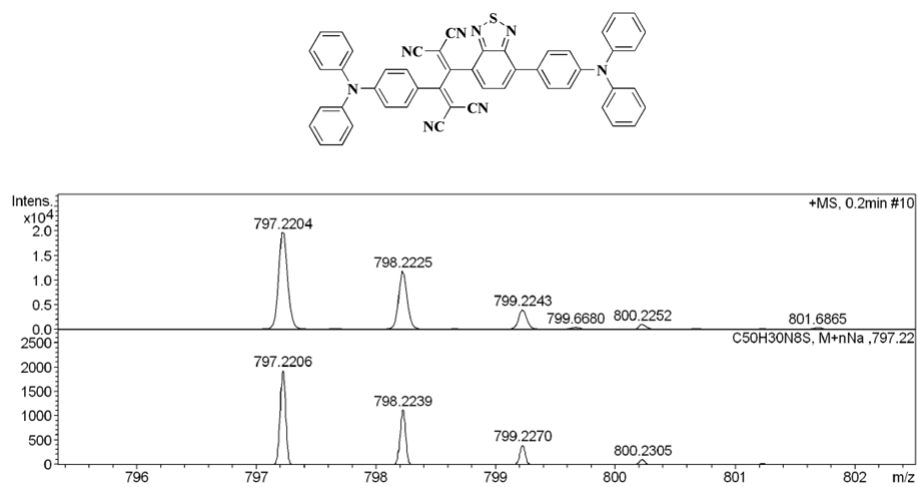

**Figure S21.** HRMS spectra of **BTD 9**

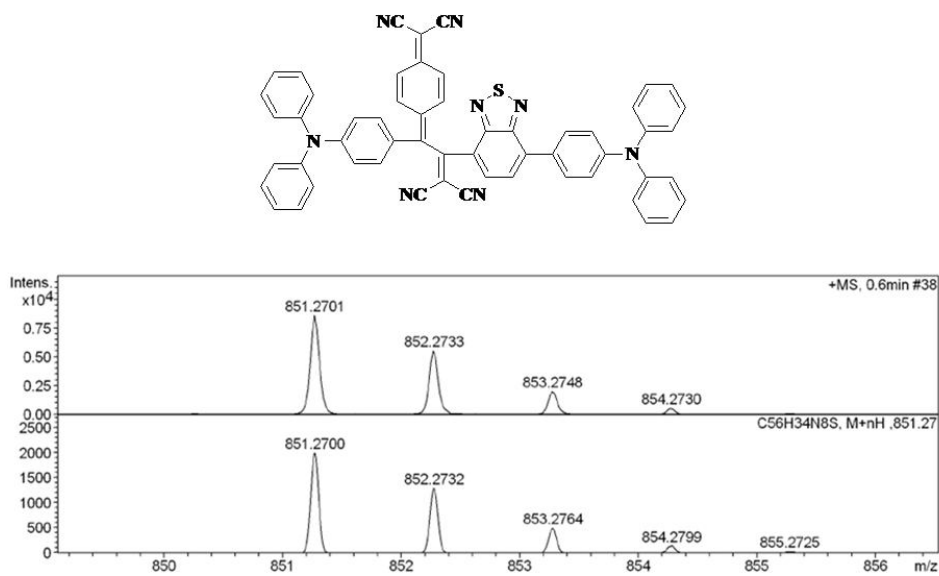

**Figure S22.** HRMS spectra of **BTD 10**

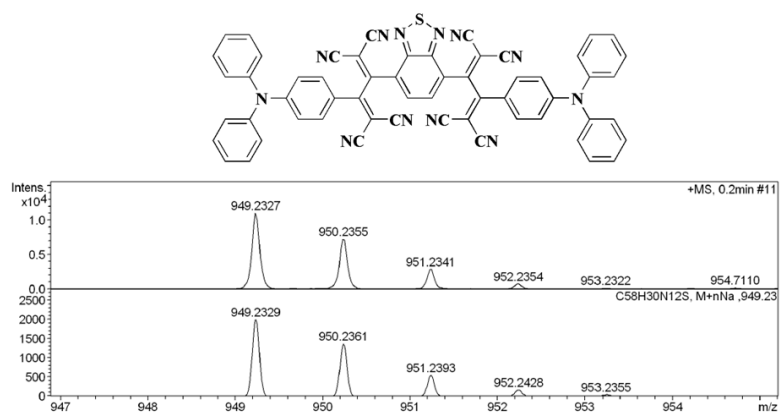

**Figure S23.** HRMS spectra of BTD 11

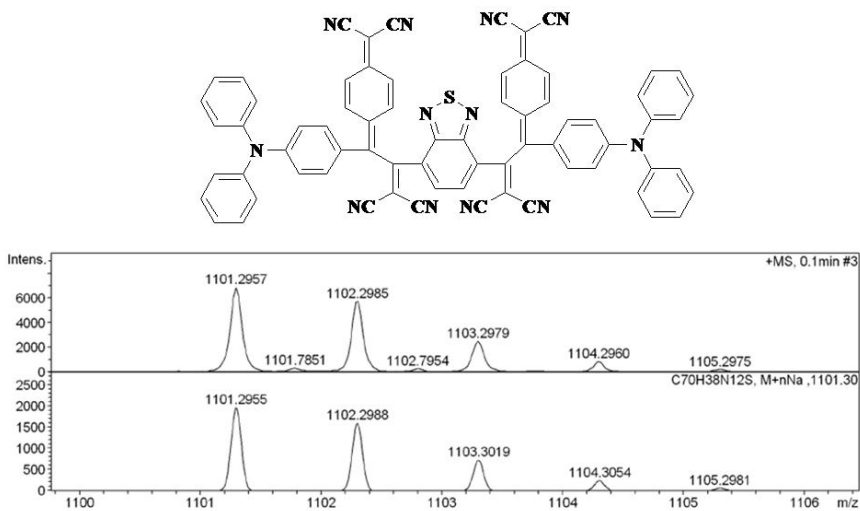

**Figure S24.** HRMS spectra of BTD 12

## II. Emission Data for BTD 5 and 6

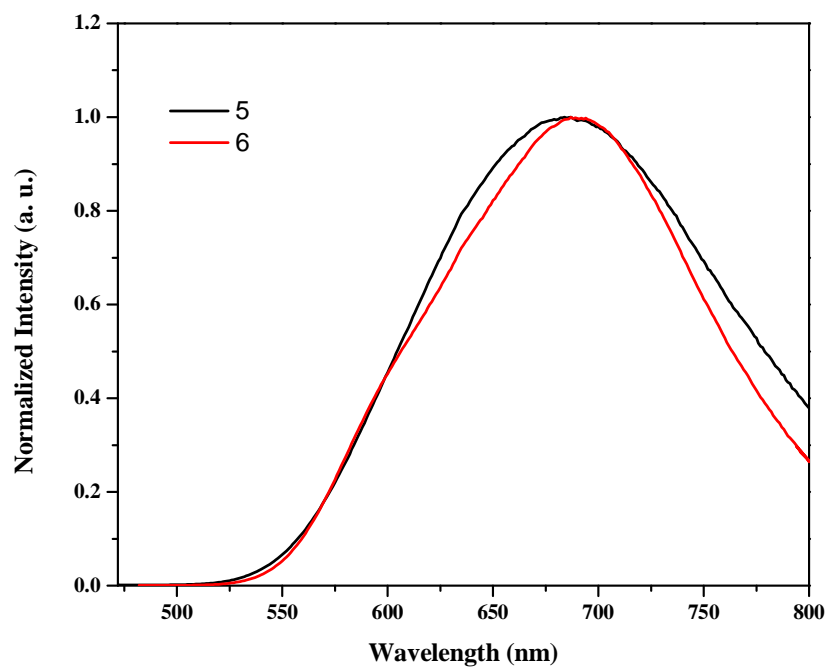

**Figure S25.** Emission spectra of BTD **5** and **6** at 0.1 absorption, excited at 462 nm and 473 nm respectively in dichloromethane (recorded at  $T = 293$  K).

### III. Electrochemical Data for BTD 5–12

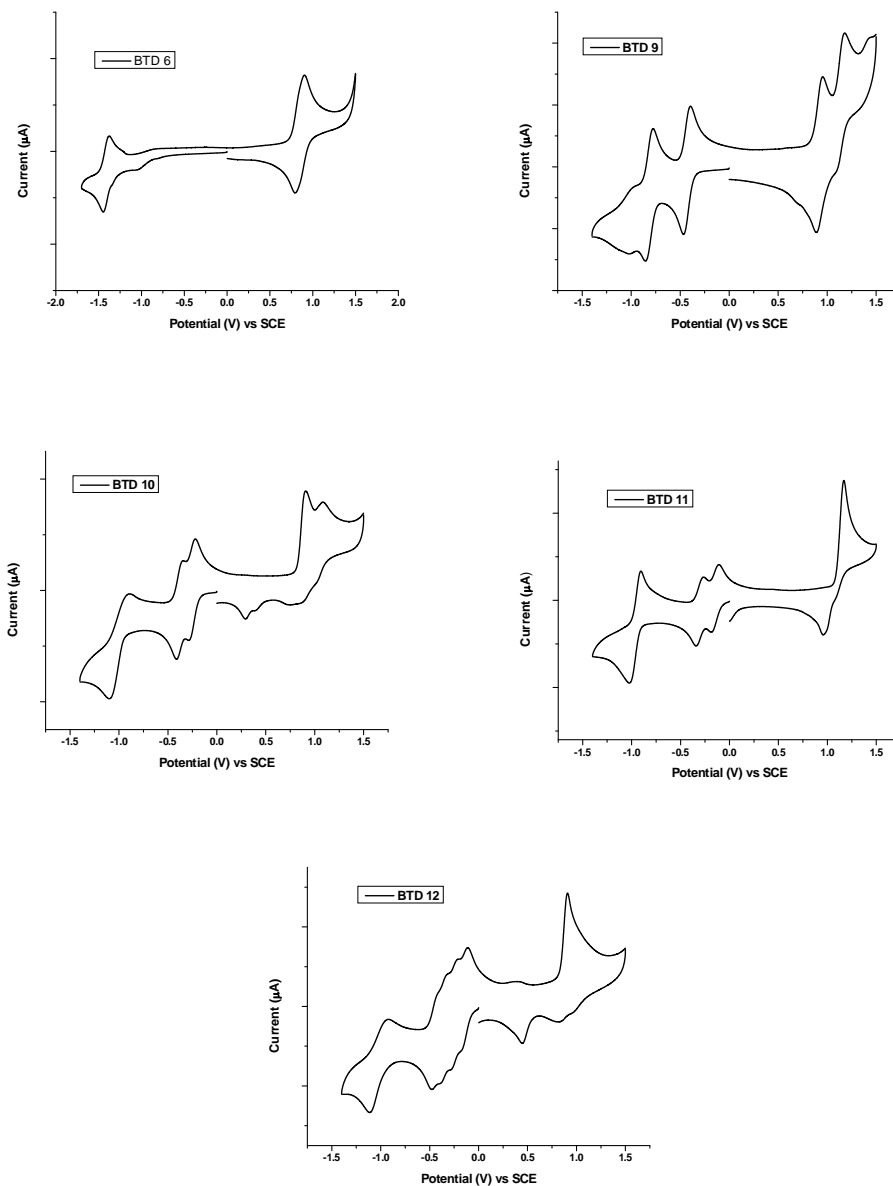

**Figure S26.** Cyclic voltammogram of benzothiadiazoles **6**, **9**, **10**, **11** and **12** at 0.01 M concentration in 0.1 M TBAPF<sub>6</sub> in dichloromethane recorded at 100 mVs<sup>-1</sup> scan speed.

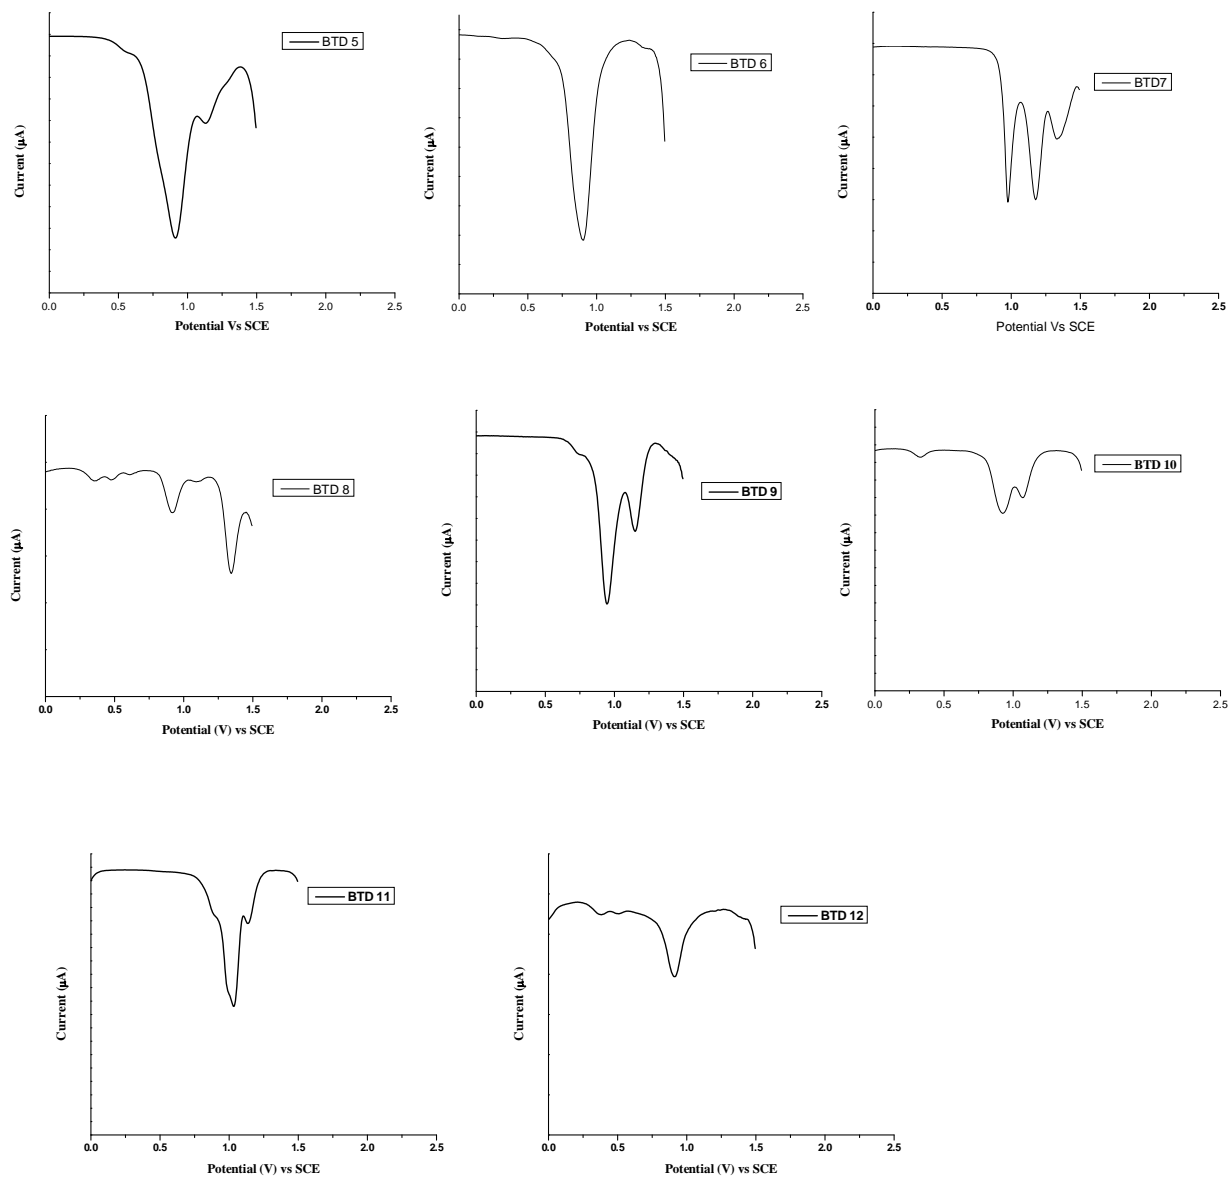

**Figure S27.** Differential pulse voltammogram of benzothiadiazoles **5–12** at 0.01 M concentration in 0.1 M TBAPF<sub>6</sub> in dichloromethane (representing the oxidation waves).



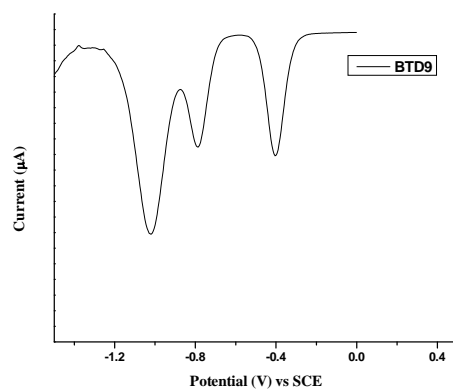

**Figure S28.** Differential pulse voltammogram of benzothiadiazoles **9** at 0.01 M concentration in 0.1 M TBAPF<sub>6</sub> in dichloromethane (representing the reduction waves).

## VI. Thermogravimetric analysis data

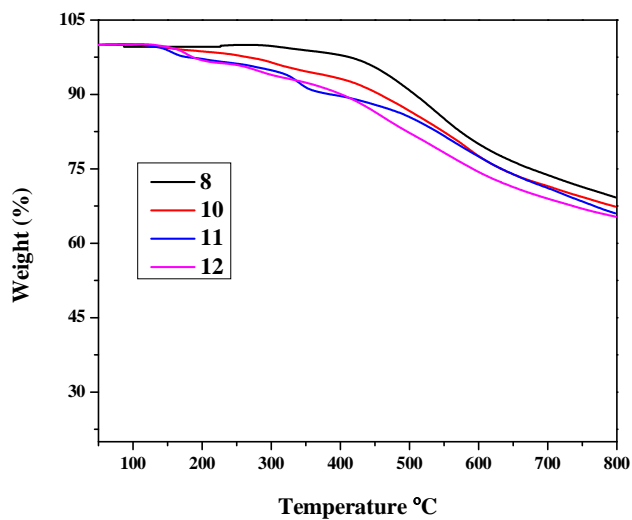

**Figure S29.** TGA plots of benzothiadiazoles **8**, **10–12** at a heating rate of 10 °C min<sup>-1</sup>, under a nitrogen atmosphere.

## V. DFT calculation

### BTD 5

Standard orientation:

| Center<br>Number | Atomic<br>Number | Atomic<br>Type | Coordinates (Angstroms) |           |           |
|------------------|------------------|----------------|-------------------------|-----------|-----------|
|                  |                  |                | X                       | Y         | Z         |
| 1                | 16               | 0              | 3.100464                | -2.560943 | 1.882939  |
| 2                | 7                | 0              | 1.834397                | -1.723688 | 1.255785  |
| 3                | 7                | 0              | 4.354132                | -1.708279 | 1.251759  |
| 4                | 6                | 0              | 2.359056                | -0.737493 | 0.523950  |
| 5                | 6                | 0              | 3.811946                | -0.731068 | 0.517622  |
| 6                | 6                | 0              | 4.525840                | 0.272654  | -0.218918 |
| 7                | 6                | 0              | 3.773680                | 1.216178  | -0.888742 |
| 8                | 1                | 0              | 4.290338                | 1.982642  | -1.457265 |
| 9                | 6                | 0              | 2.354690                | 1.219432  | -0.872577 |
| 10               | 1                | 0              | 1.830465                | 1.991040  | -1.426129 |
| 11               | 6                | 0              | 1.610008                | 0.265394  | -0.192576 |
| 12               | 6                | 0              | 0.196662                | 0.260138  | -0.186219 |
| 13               | 6                | 0              | -1.021331               | 0.251346  | -0.181504 |
| 14               | 6                | 0              | -2.439646               | 0.220732  | -0.161918 |
| 15               | 6                | 0              | -3.202970               | 1.159489  | -0.887404 |
| 16               | 6                | 0              | -3.128930               | -0.756323 | 0.587884  |
| 17               | 6                | 0              | -4.589202               | 1.120435  | -0.870422 |
| 18               | 1                | 0              | -2.692846               | 1.912707  | -1.479392 |
| 19               | 6                | 0              | -4.514889               | -0.789103 | 0.616041  |
| 20               | 1                | 0              | -2.558406               | -1.480242 | 1.160659  |
| 21               | 6                | 0              | -5.272427               | 0.146844  | -0.115449 |
| 22               | 1                | 0              | -5.155836               | 1.842668  | -1.447451 |
| 23               | 1                | 0              | -5.023765               | -1.539551 | 1.210705  |
| 24               | 7                | 0              | -6.683205               | 0.109976  | -0.092635 |
| 25               | 6                | 0              | -7.438156               | 1.317499  | -0.151293 |
| 26               | 6                | 0              | -7.372126               | -1.135310 | -0.012269 |
| 27               | 6                | 0              | -7.076516               | 2.423597  | 0.633844  |
| 28               | 6                | 0              | -8.561139               | 1.410242  | -0.988031 |
| 29               | 6                | 0              | -8.463308               | -1.285347 | 0.857543  |
| 30               | 6                | 0              | -6.977294               | -2.221753 | -0.808744 |
| 31               | 6                | 0              | -7.818582               | 3.601668  | 0.569820  |
| 32               | 1                | 0              | -6.215200               | 2.352978  | 1.289947  |
| 33               | 6                | 0              | -9.307411               | 2.586615  | -1.031890 |
| 34               | 1                | 0              | -8.842853               | 0.558472  | -1.598239 |
| 35               | 6                | 0              | -9.146348               | -2.498576 | 0.922511  |
| 36               | 1                | 0              | -8.770045               | -0.448949 | 1.476913  |
| 37               | 6                | 0              | -7.655286               | -3.436534 | -0.723539 |
| 38               | 1                | 0              | -6.140330               | -2.107388 | -1.489668 |
| 39               | 6                | 0              | -8.939361               | 3.689977  | -0.258900 |
| 40               | 1                | 0              | -7.526175               | 4.449074  | 1.183414  |
| 41               | 1                | 0              | -10.174018              | 2.643411  | -1.684493 |

|    |   |   |           |           |           |
|----|---|---|-----------|-----------|-----------|
| 42 | 6 | 0 | -8.744965 | -3.581942 | 0.137937  |
| 43 | 1 | 0 | -9.988997 | -2.599624 | 1.600615  |
| 44 | 1 | 0 | -7.337598 | -4.268305 | -1.345867 |
| 45 | 1 | 0 | -9.519385 | 4.606828  | -0.300811 |
| 46 | 1 | 0 | -9.275241 | -4.527552 | 0.196374  |
| 47 | 7 | 0 | 5.936140  | 0.313654  | -0.221128 |
| 48 | 6 | 0 | 6.715752  | 1.405569  | 0.189621  |
| 49 | 6 | 0 | 6.795941  | -0.694985 | -0.681185 |
| 50 | 6 | 0 | 6.314648  | 2.625585  | 0.739181  |
| 51 | 6 | 0 | 8.084337  | 1.088508  | 0.000824  |
| 52 | 6 | 0 | 6.487423  | -1.940935 | -1.230967 |
| 53 | 6 | 0 | 8.134543  | -0.246997 | -0.558783 |
| 54 | 6 | 0 | 7.309360  | 3.537977  | 1.086952  |
| 55 | 1 | 0 | 5.266514  | 2.855612  | 0.896487  |
| 56 | 6 | 0 | 9.063333  | 2.022700  | 0.358261  |
| 57 | 6 | 0 | 7.546727  | -2.748178 | -1.639278 |
| 58 | 1 | 0 | 5.461394  | -2.274660 | -1.332764 |
| 59 | 6 | 0 | 9.181359  | -1.077781 | -0.976003 |
| 60 | 6 | 0 | 8.670458  | 3.244994  | 0.896979  |
| 61 | 1 | 0 | 7.022779  | 4.493869  | 1.515834  |
| 62 | 1 | 0 | 10.116385 | 1.793787  | 0.220578  |
| 63 | 6 | 0 | 8.881598  | -2.326630 | -1.511985 |
| 64 | 1 | 0 | 7.333023  | -3.723997 | -2.065751 |
| 65 | 1 | 0 | 10.212742 | -0.748082 | -0.887481 |
| 66 | 1 | 0 | 9.420702  | 3.978253  | 1.176996  |
| 67 | 1 | 0 | 9.683853  | -2.981228 | -1.838933 |

-----  
Total energy (Sum of electronic and zero-point energies): -2079.647759  
Hartree

## **BTD 6**

Standard orientation:

| Center<br>Number | Atomic<br>Number | Atomic<br>Type | Coordinates (Angstroms) |           |           |
|------------------|------------------|----------------|-------------------------|-----------|-----------|
|                  |                  |                | X                       | Y         | Z         |
| 1                | 16               | 0              | -1.013314               | -3.249917 | -0.799663 |
| 2                | 7                | 0              | 0.214365                | -2.182481 | -0.574504 |
| 3                | 7                | 0              | -2.300746               | -2.259153 | -0.558551 |
| 4                | 6                | 0              | -0.354167               | -1.006097 | -0.300663 |
| 5                | 6                | 0              | -1.809311               | -1.043478 | -0.286137 |
| 6                | 6                | 0              | -2.582130               | 0.144750  | -0.020198 |
| 7                | 6                | 0              | -1.840111               | 1.291877  | 0.218545  |
| 8                | 1                | 0              | -2.366826               | 2.209892  | 0.458737  |
| 9                | 6                | 0              | -0.424134               | 1.336874  | 0.204538  |
| 10               | 1                | 0              | 0.068913                | 2.281092  | 0.411684  |
| 11               | 6                | 0              | 0.359279                | 0.219141  | -0.044569 |

|    |   |   |            |           |           |
|----|---|---|------------|-----------|-----------|
| 12 | 6 | 0 | 1.772452   | 0.254558  | -0.043342 |
| 13 | 6 | 0 | 2.990225   | 0.279059  | -0.035356 |
| 14 | 6 | 0 | 4.409409   | 0.274419  | -0.022429 |
| 15 | 6 | 0 | 5.145980   | 1.456055  | 0.203680  |
| 16 | 6 | 0 | 5.126468   | -0.923416 | -0.229876 |
| 17 | 6 | 0 | 6.533078   | 1.440420  | 0.232866  |
| 18 | 1 | 0 | 4.614257   | 2.386826  | 0.373938  |
| 19 | 6 | 0 | 6.513170   | -0.938340 | -0.212705 |
| 20 | 1 | 0 | 4.576849   | -1.840168 | -0.417227 |
| 21 | 6 | 0 | 7.242875   | 0.242368  | 0.025147  |
| 22 | 1 | 0 | 7.078939   | 2.357741  | 0.424142  |
| 23 | 1 | 0 | 7.044375   | -1.867829 | -0.385684 |
| 24 | 7 | 0 | 8.655783   | 0.222508  | 0.058173  |
| 25 | 6 | 0 | 9.405150   | 1.323626  | -0.446089 |
| 26 | 6 | 0 | 9.345179   | -0.893545 | 0.614016  |
| 27 | 6 | 0 | 9.060899   | 1.920574  | -1.669406 |
| 28 | 6 | 0 | 10.505535  | 1.819648  | 0.270632  |
| 29 | 6 | 0 | 10.469391  | -1.427516 | -0.035175 |
| 30 | 6 | 0 | 8.915532   | -1.468005 | 1.820907  |
| 31 | 6 | 0 | 9.798846   | 2.998148  | -2.155994 |
| 32 | 1 | 0 | 8.216995   | 1.534930  | -2.231917 |
| 33 | 6 | 0 | 11.248041  | 2.886276  | -0.232864 |
| 34 | 1 | 0 | 10.772541  | 1.363609  | 1.218203  |
| 35 | 6 | 0 | 11.150856  | -2.509920 | 0.518625  |
| 36 | 1 | 0 | 10.802017  | -0.989183 | -0.970308 |
| 37 | 6 | 0 | 9.592809   | -2.561447 | 2.357508  |
| 38 | 1 | 0 | 8.052018   | -1.053997 | 2.330990  |
| 39 | 6 | 0 | 10.898029  | 3.485173  | -1.444986 |
| 40 | 1 | 0 | 9.520202   | 3.448974  | -3.104321 |
| 41 | 1 | 0 | 12.096963  | 3.258478  | 0.333707  |
| 42 | 6 | 0 | 10.715598  | -3.086591 | 1.713862  |
| 43 | 1 | 0 | 12.019037  | -2.912047 | 0.004094  |
| 44 | 1 | 0 | 9.247703   | -2.995149 | 3.291835  |
| 45 | 1 | 0 | 11.474681  | 4.320145  | -1.831150 |
| 46 | 1 | 0 | 11.244858  | -3.934179 | 2.138487  |
| 47 | 6 | 0 | -4.057623  | 0.159339  | -0.009005 |
| 48 | 6 | 0 | -4.763085  | 1.308071  | -0.417962 |
| 49 | 6 | 0 | -4.819911  | -0.940737 | 0.429040  |
| 50 | 6 | 0 | -6.150048  | 1.363885  | -0.389002 |
| 51 | 1 | 0 | -4.216244  | 2.160279  | -0.810246 |
| 52 | 6 | 0 | -6.207106  | -0.886911 | 0.478065  |
| 53 | 1 | 0 | -4.317001  | -1.843642 | 0.751940  |
| 54 | 6 | 0 | -6.900078  | 0.265433  | 0.067962  |
| 55 | 1 | 0 | -6.662219  | 2.254611  | -0.736337 |
| 56 | 1 | 0 | -6.764412  | -1.743262 | 0.842071  |
| 57 | 7 | 0 | -8.313536  | 0.315162  | 0.103937  |
| 58 | 6 | 0 | -8.982604  | 1.525297  | 0.440807  |
| 59 | 6 | 0 | -9.080635  | -0.843340 | -0.208976 |
| 60 | 6 | 0 | -8.531606  | 2.317792  | 1.508894  |
| 61 | 6 | 0 | -10.109849 | 1.939353  | -0.286869 |
| 62 | 6 | 0 | -10.191073 | -1.191821 | 0.576169  |
| 63 | 6 | 0 | -8.743325  | -1.647201 | -1.309601 |
| 64 | 6 | 0 | -9.190338  | 3.503093  | 1.830673  |

|    |   |   |            |           |           |
|----|---|---|------------|-----------|-----------|
| 65 | 1 | 0 | -7.666688  | 1.998413  | 2.080795  |
| 66 | 6 | 0 | -10.772513 | 3.116994  | 0.054151  |
| 67 | 1 | 0 | -10.460611 | 1.333525  | -1.115751 |
| 68 | 6 | 0 | -10.949739 | -2.317171 | 0.259017  |
| 69 | 1 | 0 | -10.453429 | -0.576469 | 1.430452  |
| 70 | 6 | 0 | -9.497432  | -2.780640 | -1.608009 |
| 71 | 1 | 0 | -7.890517  | -1.379502 | -1.924630 |
| 72 | 6 | 0 | -10.315988 | 3.908724  | 1.110131  |
| 73 | 1 | 0 | -8.828709  | 4.104268  | 2.660229  |
| 74 | 1 | 0 | -11.643171 | 3.422825  | -0.519193 |
| 75 | 6 | 0 | -10.606547 | -3.120832 | -0.830351 |
| 76 | 1 | 0 | -11.805976 | -2.573227 | 0.876741  |
| 77 | 1 | 0 | -9.222805  | -3.392386 | -2.462733 |
| 78 | 1 | 0 | -10.830804 | 4.828997  | 1.368821  |
| 79 | 1 | 0 | -11.195671 | -4.000782 | -1.070160 |

-----  
Total energy (Sum of electronic and zero-point energies): -2311.8903622  
Hartree

## **BTD 7**

Standard orientation:

| Center<br>Number | Atomic<br>Number | Atomic<br>Type | Coordinates (Angstroms) |           |           |
|------------------|------------------|----------------|-------------------------|-----------|-----------|
|                  |                  |                | X                       | Y         | Z         |
| 1                | 16               | 0              | 4.592399                | -2.626093 | 1.916482  |
| 2                | 7                | 0              | 4.978535                | -1.202413 | 1.201795  |
| 3                | 7                | 0              | 3.049003                | -2.804810 | 1.387215  |
| 4                | 6                | 0              | 3.899867                | -0.816108 | 0.513199  |
| 5                | 6                | 0              | 2.785683                | -1.736992 | 0.626638  |
| 6                | 6                | 0              | 1.533569                | -1.454800 | -0.007238 |
| 7                | 6                | 0              | 1.441495                | -0.279214 | -0.723000 |
| 8                | 1                | 0              | 0.512250                | -0.027303 | -1.222867 |
| 9                | 6                | 0              | 2.537726                | 0.617454  | -0.855445 |
| 10               | 1                | 0              | 2.407105                | 1.512823  | -1.452793 |
| 11               | 6                | 0              | 3.763660                | 0.386648  | -0.263289 |
| 12               | 6                | 0              | 0.428814                | -2.417016 | 0.122545  |
| 13               | 6                | 0              | -1.047407               | -2.452911 | 0.187232  |
| 14               | 6                | 0              | -0.214629               | -2.994043 | 1.372457  |
| 15               | 6                | 0              | -0.349989               | -3.222460 | -0.931233 |
| 16               | 6                | 0              | -0.152631               | -4.391503 | 1.779624  |
| 17               | 6                | 0              | -0.180866               | -2.100708 | 2.521697  |
| 18               | 6                | 0              | -0.317711               | -4.673582 | -1.068463 |
| 19               | 6                | 0              | -0.426661               | -2.569188 | -2.231464 |
| 20               | 7                | 0              | -0.125474               | -5.481366 | 2.177695  |
| 21               | 7                | 0              | -0.159420               | -1.384211 | 3.434368  |

|    |   |   |           |           |           |
|----|---|---|-----------|-----------|-----------|
| 22 | 7 | 0 | -0.299803 | -5.817097 | -1.266934 |
| 23 | 7 | 0 | -0.476441 | -2.048065 | -3.267197 |
| 24 | 7 | 0 | 4.817655  | 1.308139  | -0.372981 |
| 25 | 6 | 0 | 4.719227  | 2.686134  | -0.101876 |
| 26 | 6 | 0 | 6.114765  | 1.043501  | -0.853188 |
| 27 | 6 | 0 | 3.648448  | 3.415671  | 0.419161  |
| 28 | 6 | 0 | 5.962961  | 3.297269  | -0.392397 |
| 29 | 6 | 0 | 6.666097  | -0.152845 | -1.315001 |
| 30 | 6 | 0 | 6.846145  | 2.255172  | -0.876788 |
| 31 | 6 | 0 | 3.834548  | 4.781721  | 0.627081  |
| 32 | 1 | 0 | 2.704559  | 2.941430  | 0.664151  |
| 33 | 6 | 0 | 6.124469  | 4.670094  | -0.175149 |
| 34 | 6 | 0 | 7.980795  | -0.124309 | -1.775525 |
| 35 | 1 | 0 | 6.100417  | -1.076616 | -1.314143 |
| 36 | 6 | 0 | 8.165884  | 2.258074  | -1.342938 |
| 37 | 6 | 0 | 5.056459  | 5.406971  | 0.329786  |
| 38 | 1 | 0 | 3.015982  | 5.370337  | 1.030595  |
| 39 | 1 | 0 | 7.073277  | 5.152008  | -0.392819 |
| 40 | 6 | 0 | 8.728467  | 1.065126  | -1.786512 |
| 41 | 1 | 0 | 8.433469  | -1.043718 | -2.134811 |
| 42 | 1 | 0 | 8.738149  | 3.181034  | -1.364611 |
| 43 | 1 | 0 | 5.168832  | 6.473067  | 0.501355  |
| 44 | 1 | 0 | 9.751177  | 1.052004  | -2.150573 |
| 45 | 6 | 0 | -2.213230 | -1.557623 | 0.119770  |
| 46 | 6 | 0 | -2.179020 | -0.252500 | 0.637891  |
| 47 | 6 | 0 | -3.406466 | -2.018423 | -0.458814 |
| 48 | 6 | 0 | -3.298449 | 0.565525  | 0.574907  |
| 49 | 1 | 0 | -1.268672 | 0.132512  | 1.085569  |
| 50 | 6 | 0 | -4.530304 | -1.207095 | -0.520137 |
| 51 | 1 | 0 | -3.460110 | -3.029228 | -0.852983 |
| 52 | 6 | 0 | -4.499755 | 0.104597  | -0.002994 |
| 53 | 1 | 0 | -3.245479 | 1.574097  | 0.967575  |
| 54 | 1 | 0 | -5.443008 | -1.588045 | -0.962666 |
| 55 | 7 | 0 | -5.633487 | 0.929725  | -0.064349 |
| 56 | 6 | 0 | -6.597974 | 0.770038  | -1.107451 |
| 57 | 6 | 0 | -7.963212 | 0.700400  | -0.796000 |
| 58 | 6 | 0 | -6.192871 | 0.703172  | -2.448728 |
| 59 | 6 | 0 | -8.906764 | 0.568452  | -1.813766 |
| 60 | 1 | 0 | -8.276515 | 0.752083  | 0.241668  |
| 61 | 6 | 0 | -7.142075 | 0.553497  | -3.458867 |
| 62 | 1 | 0 | -5.137334 | 0.768190  | -2.692811 |
| 63 | 6 | 0 | -8.502217 | 0.489370  | -3.147991 |
| 64 | 1 | 0 | -9.961527 | 0.515788  | -1.559950 |
| 65 | 1 | 0 | -6.816025 | 0.501700  | -4.493614 |
| 66 | 1 | 0 | -9.239119 | 0.380398  | -3.937805 |
| 67 | 6 | 0 | -5.856276 | 1.945675  | 0.915501  |
| 68 | 6 | 0 | -6.226180 | 3.237451  | 0.514238  |
| 69 | 6 | 0 | -5.730486 | 1.659214  | 2.283134  |
| 70 | 6 | 0 | -6.467553 | 4.224199  | 1.468948  |
| 71 | 1 | 0 | -6.324732 | 3.459289  | -0.543360 |
| 72 | 6 | 0 | -5.955767 | 2.657208  | 3.230101  |
| 73 | 1 | 0 | -5.457445 | 0.657019  | 2.597206  |
| 74 | 6 | 0 | -6.328641 | 3.942194  | 2.829569  |

|    |   |   |           |          |          |
|----|---|---|-----------|----------|----------|
| 75 | 1 | 0 | -6.754333 | 5.220616 | 1.145357 |
| 76 | 1 | 0 | -5.853769 | 2.422955 | 4.285743 |
| 77 | 1 | 0 | -6.511172 | 4.714710 | 3.570251 |

-----  
Total energy (Sum of electronic and zero-point energies): -2527.1551482  
Hartree

## **BTD 8**

Standard orientation:

| Center<br>Number | Atomic<br>Number | Atomic<br>Type | Coordinates (Angstroms) |           |           |
|------------------|------------------|----------------|-------------------------|-----------|-----------|
|                  |                  |                | X                       | Y         | Z         |
| 1                | 16               | 0              | 4.811031                | 1.858566  | -2.343127 |
| 2                | 7                | 0              | 5.199734                | 0.673745  | -1.278419 |
| 3                | 7                | 0              | 3.173805                | 1.833103  | -2.218447 |
| 4                | 6                | 0              | 4.046294                | 0.208262  | -0.789153 |
| 5                | 6                | 0              | 2.879517                | 0.881361  | -1.326078 |
| 6                | 6                | 0              | 1.560740                | 0.536004  | -0.887593 |
| 7                | 6                | 0              | 1.461607                | -0.454487 | 0.066366  |
| 8                | 1                | 0              | 0.481262                | -0.762119 | 0.416439  |
| 9                | 6                | 0              | 2.601080                | -1.123646 | 0.595703  |
| 10               | 1                | 0              | 2.450760                | -1.909425 | 1.327820  |
| 11               | 6                | 0              | 3.888658                | -0.828548 | 0.195189  |
| 12               | 6                | 0              | 0.411848                | 1.259481  | -1.456632 |
| 13               | 6                | 0              | -1.050613               | 1.181325  | -1.545277 |
| 14               | 6                | 0              | -0.208743               | 1.099804  | -2.842441 |
| 15               | 6                | 0              | -0.194942               | 2.083951  | -3.916036 |
| 16               | 6                | 0              | -0.086716               | -0.245213 | -3.386750 |
| 17               | 7                | 0              | -0.202666               | 2.826081  | -4.809584 |
| 18               | 7                | 0              | 0.015092                | -1.317946 | -3.818993 |
| 19               | 6                | 0              | -2.199029               | 0.374800  | -1.088531 |
| 20               | 6                | 0              | -2.157472               | -1.026823 | -0.994308 |
| 21               | 6                | 0              | -3.397267               | 1.026540  | -0.755147 |
| 22               | 6                | 0              | -3.268232               | -1.746646 | -0.573770 |
| 23               | 1                | 0              | -1.250081               | -1.564252 | -1.248940 |
| 24               | 6                | 0              | -4.514195               | 0.313151  | -0.342078 |
| 25               | 1                | 0              | -3.457801               | 2.108002  | -0.833895 |
| 26               | 6                | 0              | -4.472568               | -1.092408 | -0.241858 |
| 27               | 1                | 0              | -3.206429               | -2.825815 | -0.496104 |
| 28               | 1                | 0              | -5.429561               | 0.841299  | -0.102433 |
| 29               | 7                | 0              | -5.598162               | -1.820424 | 0.177379  |
| 30               | 6                | 0              | -6.560761               | -1.235554 | 1.057082  |
| 31               | 6                | 0              | -7.928207               | -1.323171 | 0.759606  |
| 32               | 6                | 0              | -6.152546               | -0.588888 | 2.233145  |
| 33               | 6                | 0              | -8.869622               | -0.773506 | 1.628591  |
| 34               | 1                | 0              | -8.244421               | -1.823745 | -0.149786 |

|    |   |   |           |           |           |
|----|---|---|-----------|-----------|-----------|
| 35 | 6 | 0 | -7.099681 | -0.026449 | 3.087718  |
| 36 | 1 | 0 | -5.095300 | -0.530880 | 2.471437  |
| 37 | 6 | 0 | -8.461687 | -0.118716 | 2.792688  |
| 38 | 1 | 0 | -9.925963 | -0.848006 | 1.387116  |
| 39 | 1 | 0 | -6.770879 | 0.472579  | 3.994701  |
| 40 | 1 | 0 | -9.197266 | 0.313893  | 3.463813  |
| 41 | 6 | 0 | -5.813810 | -3.160474 | -0.268989 |
| 42 | 6 | 0 | -6.171729 | -4.156032 | 0.651565  |
| 43 | 6 | 0 | -5.692898 | -3.490510 | -1.627272 |
| 44 | 6 | 0 | -6.405938 | -5.459670 | 0.216835  |
| 45 | 1 | 0 | -6.266828 | -3.900992 | 1.701991  |
| 46 | 6 | 0 | -5.911070 | -4.800830 | -2.050303 |
| 47 | 1 | 0 | -5.428811 | -2.719836 | -2.344174 |
| 48 | 6 | 0 | -6.271779 | -5.790510 | -1.133215 |
| 49 | 1 | 0 | -6.683237 | -6.221374 | 0.939803  |
| 50 | 1 | 0 | -5.812867 | -5.043817 | -3.104331 |
| 51 | 1 | 0 | -6.448329 | -6.808130 | -1.467819 |
| 52 | 6 | 0 | -0.432626 | 2.440695  | -0.902426 |
| 53 | 6 | 0 | -0.443680 | 3.799322  | -1.490024 |
| 54 | 6 | 0 | -0.536535 | 2.418105  | 0.575718  |
| 55 | 6 | 0 | -0.536408 | 4.911673  | -0.730159 |
| 56 | 1 | 0 | -0.368382 | 3.912573  | -2.561911 |
| 57 | 6 | 0 | -0.629300 | 3.534977  | 1.322574  |
| 58 | 1 | 0 | -0.538061 | 1.448438  | 1.062285  |
| 59 | 1 | 0 | -0.536532 | 5.887463  | -1.205121 |
| 60 | 1 | 0 | -0.702161 | 3.463652  | 2.402896  |
| 61 | 6 | 0 | -0.636143 | 4.852589  | 0.714432  |
| 62 | 6 | 0 | -0.734200 | 5.999247  | 1.486031  |
| 63 | 6 | 0 | -0.835196 | 5.935167  | 2.909213  |
| 64 | 6 | 0 | -0.742130 | 7.301263  | 0.899654  |
| 65 | 7 | 0 | -0.918408 | 5.863316  | 4.068839  |
| 66 | 7 | 0 | -0.748910 | 8.358637  | 0.411390  |
| 67 | 7 | 0 | 5.000565  | -1.480003 | 0.754232  |
| 68 | 6 | 0 | 5.997394  | -2.184465 | 0.052213  |
| 69 | 6 | 0 | 5.253773  | -1.611474 | 2.132464  |
| 70 | 6 | 0 | 6.135168  | -2.400091 | -1.320021 |
| 71 | 6 | 0 | 6.893468  | -2.755935 | 0.987186  |
| 72 | 6 | 0 | 4.564795  | -1.068488 | 3.219080  |
| 73 | 6 | 0 | 6.426318  | -2.385635 | 2.308291  |
| 74 | 6 | 0 | 7.209246  | -3.177496 | -1.748115 |
| 75 | 1 | 0 | 5.438516  | -1.977920 | -2.034091 |
| 76 | 6 | 0 | 7.965449  | -3.532531 | 0.532302  |
| 77 | 6 | 0 | 5.058488  | -1.329731 | 4.496596  |
| 78 | 1 | 0 | 3.679880  | -0.457004 | 3.081190  |
| 79 | 6 | 0 | 6.901576  | -2.633738 | 3.600752  |
| 80 | 6 | 0 | 8.120131  | -3.735799 | -0.835599 |
| 81 | 1 | 0 | 7.340526  | -3.355267 | -2.811338 |
| 82 | 1 | 0 | 8.660913  | -3.975948 | 1.239113  |
| 83 | 6 | 0 | 6.211884  | -2.107402 | 4.689788  |
| 84 | 1 | 0 | 4.539345  | -0.918696 | 5.357351  |
| 85 | 1 | 0 | 7.800483  | -3.224844 | 3.750525  |
| 86 | 1 | 0 | 8.947125  | -4.335687 | -1.202852 |
| 87 | 1 | 0 | 6.570000  | -2.293878 | 5.697536  |



-----  
Total energy (Sum of electronic and zero-point energies): -2758.1914218  
Hartree

**BTD 9**

Standard orientation:

| Center<br>Number | Atomic<br>Number | Atomic<br>Type | Coordinates (Angstroms) |           |           |
|------------------|------------------|----------------|-------------------------|-----------|-----------|
|                  |                  |                | X                       | Y         | Z         |
| 1                | 16               | 0              | -2.209860               | 4.639350  | 1.075221  |
| 2                | 7                | 0              | -2.994969               | 3.243980  | 0.721141  |
| 3                | 7                | 0              | -0.687429               | 4.232585  | 0.613712  |
| 4                | 6                | 0              | -2.086066               | 2.398116  | 0.220125  |
| 5                | 6                | 0              | -0.754506               | 2.975273  | 0.165405  |
| 6                | 6                | 0              | 0.355239                | 2.213636  | -0.318688 |
| 7                | 6                | 0              | 0.095941                | 0.921002  | -0.724259 |
| 8                | 1                | 0              | 0.905090                | 0.307820  | -1.107767 |
| 9                | 6                | 0              | -1.208669               | 0.361578  | -0.680011 |
| 10               | 1                | 0              | -1.332454               | -0.648617 | -1.054720 |
| 11               | 6                | 0              | -2.324807               | 1.043436  | -0.218176 |
| 12               | 6                | 0              | 1.681864                | 2.841708  | -0.387373 |
| 13               | 6                | 0              | 3.115724                | 2.496816  | -0.309148 |
| 14               | 6                | 0              | 2.510554                | 3.488289  | 0.711039  |
| 15               | 6                | 0              | 2.598841                | 3.160278  | -1.582718 |
| 16               | 6                | 0              | 2.839404                | 4.905100  | 0.793833  |
| 17               | 6                | 0              | 2.294767                | 2.912360  | 2.030752  |
| 18               | 6                | 0              | 2.948719                | 4.499111  | -2.041042 |
| 19               | 6                | 0              | 2.441238                | 2.241659  | -2.702581 |
| 20               | 7                | 0              | 3.120659                | 6.021832  | 0.938399  |
| 21               | 7                | 0              | 2.129096                | 2.448136  | 3.081409  |
| 22               | 7                | 0              | 3.228418                | 5.532250  | -2.490401 |
| 23               | 7                | 0              | 2.307822                | 1.512641  | -3.595651 |
| 24               | 6                | 0              | 4.007965                | 1.336496  | -0.153902 |
| 25               | 6                | 0              | 3.658141                | 0.229475  | 0.636320  |
| 26               | 6                | 0              | 5.257755                | 1.337217  | -0.792765 |
| 27               | 6                | 0              | 4.528202                | -0.842900 | 0.779060  |
| 28               | 1                | 0              | 2.695414                | 0.200040  | 1.136097  |
| 29               | 6                | 0              | 6.134176                | 0.271046  | -0.648587 |
| 30               | 1                | 0              | 5.553610                | 2.189185  | -1.398243 |
| 31               | 6                | 0              | 5.786455                | -0.842845 | 0.142505  |
| 32               | 1                | 0              | 4.232948                | -1.693922 | 1.381488  |
| 33               | 1                | 0              | 7.098259                | 0.298900  | -1.142386 |
| 34               | 7                | 0              | 6.669695                | -1.925329 | 0.290412  |
| 35               | 6                | 0              | 7.599230                | -2.254607 | -0.743903 |
| 36               | 6                | 0              | 8.948251                | -2.474896 | -0.431274 |
| 37               | 6                | 0              | 7.171155                | -2.380092 | -2.073962 |
| 38               | 6                | 0              | 9.851877                | -2.819127 | -1.435517 |
| 39               | 1                | 0              | 9.279366                | -2.376603 | 0.597430  |

|    |   |   |            |           |           |
|----|---|---|------------|-----------|-----------|
| 40 | 6 | 0 | 8.085162   | -2.707257 | -3.074587 |
| 41 | 1 | 0 | 6.125560   | -2.219901 | -2.316797 |
| 42 | 6 | 0 | 9.427566   | -2.932218 | -2.761146 |
| 43 | 1 | 0 | 10.894218  | -2.987420 | -1.180601 |
| 44 | 1 | 0 | 7.741721   | -2.800054 | -4.100830 |
| 45 | 1 | 0 | 10.135080  | -3.193948 | -3.541956 |
| 46 | 6 | 0 | 6.671799   | -2.712705 | 1.482096  |
| 47 | 6 | 0 | 6.696990   | -4.112493 | 1.398132  |
| 48 | 6 | 0 | 6.670024   | -2.099656 | 2.744203  |
| 49 | 6 | 0 | 6.722427   | -4.882999 | 2.559582  |
| 50 | 1 | 0 | 6.699404   | -4.587724 | 0.422618  |
| 51 | 6 | 0 | 6.676987   | -2.878595 | 3.900289  |
| 52 | 1 | 0 | 6.662859   | -1.016741 | 2.813720  |
| 53 | 6 | 0 | 6.707119   | -4.272271 | 3.815367  |
| 54 | 1 | 0 | 6.742517   | -5.966152 | 2.480459  |
| 55 | 1 | 0 | 6.673897   | -2.391172 | 4.870912  |
| 56 | 1 | 0 | 6.720361   | -4.875466 | 4.717978  |
| 57 | 6 | 0 | -3.654025  | 0.410026  | -0.171573 |
| 58 | 6 | 0 | -3.776312  | -0.974079 | 0.062280  |
| 59 | 6 | 0 | -4.842774  | 1.135408  | -0.382665 |
| 60 | 6 | 0 | -5.011415  | -1.604752 | 0.081775  |
| 61 | 1 | 0 | -2.889581  | -1.561167 | 0.281584  |
| 62 | 6 | 0 | -6.081490  | 0.509242  | -0.384796 |
| 63 | 1 | 0 | -4.793522  | 2.200792  | -0.569739 |
| 64 | 6 | 0 | -6.193025  | -0.874408 | -0.151181 |
| 65 | 1 | 0 | -5.071024  | -2.666218 | 0.294433  |
| 66 | 1 | 0 | -6.975062  | 1.092465  | -0.576887 |
| 67 | 7 | 0 | -7.450423  | -1.510650 | -0.141943 |
| 68 | 6 | 0 | -7.584892  | -2.855961 | -0.594603 |
| 69 | 6 | 0 | -8.610290  | -0.817895 | 0.315597  |
| 70 | 6 | 0 | -6.967649  | -3.273990 | -1.783930 |
| 71 | 6 | 0 | -8.350186  | -3.775005 | 0.139520  |
| 72 | 6 | 0 | -9.806868  | -0.886336 | -0.413878 |
| 73 | 6 | 0 | -8.573678  | -0.072790 | 1.504420  |
| 74 | 6 | 0 | -7.104998  | -4.590897 | -2.219499 |
| 75 | 1 | 0 | -6.384783  | -2.563371 | -2.360670 |
| 76 | 6 | 0 | -8.496581  | -5.085051 | -0.313412 |
| 77 | 1 | 0 | -8.826860  | -3.455432 | 1.060341  |
| 78 | 6 | 0 | -10.945393 | -0.225033 | 0.043754  |
| 79 | 1 | 0 | -9.837184  | -1.458601 | -1.335304 |
| 80 | 6 | 0 | -9.712411  | 0.599645  | 1.944796  |
| 81 | 1 | 0 | -7.652702  | -0.023876 | 2.076094  |
| 82 | 6 | 0 | -7.872115  | -5.502590 | -1.490729 |
| 83 | 1 | 0 | -6.622104  | -4.899844 | -3.142231 |
| 84 | 1 | 0 | -9.092358  | -5.785246 | 0.265200  |
| 85 | 6 | 0 | -10.904750 | 0.524589  | 1.221295  |
| 86 | 1 | 0 | -11.864822 | -0.287002 | -0.531407 |
| 87 | 1 | 0 | -9.669159  | 1.172949  | 2.866434  |
| 88 | 1 | 0 | -7.983398  | -6.525489 | -1.837237 |
| 89 | 1 | 0 | -11.791657 | 1.043768  | 1.571451  |

-----  
Total energy (Sum of electronic and zero-point energies): -2759.3997905  
Hartree

**BTD 10**

Standard orientation:

| Center<br>Number | Atomic<br>Number | Atomic<br>Type | Coordinates (Angstroms) |           |           |
|------------------|------------------|----------------|-------------------------|-----------|-----------|
|                  |                  |                | X                       | Y         | Z         |
| 1                | 16               | 0              | 2.460377                | 3.949407  | -2.337874 |
| 2                | 7                | 0              | 3.274975                | 2.697289  | -1.660458 |
| 3                | 7                | 0              | 0.915078                | 3.459114  | -2.072831 |
| 4                | 6                | 0              | 2.358928                | 1.839955  | -1.193669 |
| 5                | 6                | 0              | 0.997914                | 2.284703  | -1.439650 |
| 6                | 6                | 0              | -0.121927               | 1.492296  | -1.032932 |
| 7                | 6                | 0              | 0.163193                | 0.298277  | -0.405402 |
| 8                | 1                | 0              | -0.651917               | -0.341784 | -0.081392 |
| 9                | 6                | 0              | 1.493735                | -0.133357 | -0.155368 |
| 10               | 1                | 0              | 1.624967                | -1.069218 | 0.376953  |
| 11               | 6                | 0              | 2.619782                | 0.584824  | -0.528470 |
| 12               | 6                | 0              | -1.480424               | 1.995955  | -1.287097 |
| 13               | 6                | 0              | -2.879781               | 1.556052  | -1.265433 |
| 14               | 6                | 0              | -2.253512               | 2.012482  | -2.604971 |
| 15               | 6                | 0              | -2.637191               | 3.191467  | -3.369279 |
| 16               | 6                | 0              | -1.905685               | 0.919427  | -3.501815 |
| 17               | 7                | 0              | -2.956930               | 4.096240  | -4.023884 |
| 18               | 7                | 0              | -1.627119               | 0.047751  | -4.216371 |
| 19               | 6                | 0              | -3.727582               | 0.391663  | -0.941161 |
| 20               | 6                | 0              | -3.361274               | -0.929539 | -1.249933 |
| 21               | 6                | 0              | -4.966288               | 0.607198  | -0.316330 |
| 22               | 6                | 0              | -4.197628               | -1.993114 | -0.935953 |
| 23               | 1                | 0              | -2.413456               | -1.133543 | -1.736580 |
| 24               | 6                | 0              | -5.810977               | -0.450361 | -0.006638 |
| 25               | 1                | 0              | -5.277312               | 1.620813  | -0.081398 |
| 26               | 6                | 0              | -5.442250               | -1.776128 | -0.310390 |
| 27               | 1                | 0              | -3.886288               | -3.004126 | -1.171600 |
| 28               | 1                | 0              | -6.766425               | -0.253444 | 0.465350  |
| 29               | 7                | 0              | -6.290416               | -2.852540 | 0.002881  |
| 30               | 6                | 0              | -7.185858               | -2.776828 | 1.113556  |
| 31               | 6                | 0              | -8.531572               | -3.138774 | 0.957064  |
| 32               | 6                | 0              | -6.727727               | -2.360239 | 2.372418  |
| 33               | 6                | 0              | -9.401429               | -3.086248 | 2.045213  |
| 34               | 1                | 0              | -8.886561               | -3.460599 | -0.016528 |
| 35               | 6                | 0              | -7.608455               | -2.293541 | 3.451021  |
| 36               | 1                | 0              | -5.683987               | -2.090983 | 2.498697  |
| 37               | 6                | 0              | -8.947382               | -2.658980 | 3.294802  |
| 38               | 1                | 0              | -10.441437              | -3.369264 | 1.910920  |
| 39               | 1                | 0              | -7.241799               | -1.968124 | 4.420286  |
| 40               | 1                | 0              | -9.629050               | -2.612527 | 4.138511  |
| 41               | 6                | 0              | -6.286729               | -4.042133 | -0.787564 |
| 42               | 6                | 0              | -6.254933               | -5.297959 | -0.163923 |
| 43               | 6                | 0              | -6.335313               | -3.971225 | -2.188056 |
| 44               | 6                | 0              | -6.274580               | -6.461530 | -0.931376 |
| 45               | 1                | 0              | -6.218048               | -5.353922 | 0.919131  |
| 46               | 6                | 0              | -6.336098               | -5.139920 | -2.948031 |

|    |   |   |           |           |           |
|----|---|---|-----------|-----------|-----------|
| 47 | 1 | 0 | -6.371555 | -3.001646 | -2.674155 |
| 48 | 6 | 0 | -6.309865 | -6.389915 | -2.325525 |
| 49 | 1 | 0 | -6.250453 | -7.427748 | -0.435680 |
| 50 | 1 | 0 | -6.372293 | -5.070795 | -4.031375 |
| 51 | 1 | 0 | -6.318497 | -7.297920 | -2.920641 |
| 52 | 6 | 0 | 3.979831  | 0.080060  | -0.270953 |
| 53 | 6 | 0 | 4.234829  | -1.305890 | -0.261242 |
| 54 | 6 | 0 | 5.065410  | 0.935790  | -0.000214 |
| 55 | 6 | 0 | 5.496572  | -1.815100 | 0.007132  |
| 56 | 1 | 0 | 3.439522  | -1.999194 | -0.517953 |
| 57 | 6 | 0 | 6.327678  | 0.434767  | 0.286452  |
| 58 | 1 | 0 | 4.913250  | 2.007791  | 0.005686  |
| 59 | 6 | 0 | 6.571656  | -0.951662 | 0.294723  |
| 60 | 1 | 0 | 5.662933  | -2.886017 | -0.022939 |
| 61 | 1 | 0 | 7.135944  | 1.120472  | 0.514407  |
| 62 | 7 | 0 | 7.855629  | -1.460783 | 0.571749  |
| 63 | 6 | 0 | 8.013535  | -2.716145 | 1.228859  |
| 64 | 6 | 0 | 9.022190  | -0.732978 | 0.190310  |
| 65 | 6 | 0 | 7.250328  | -3.028601 | 2.364780  |
| 66 | 6 | 0 | 8.948555  | -3.648818 | 0.754459  |
| 67 | 6 | 0 | 10.082348 | -0.575929 | 1.095740  |
| 68 | 6 | 0 | 9.129902  | -0.180384 | -1.095126 |
| 69 | 6 | 0 | 7.412668  | -4.257671 | 3.001820  |
| 70 | 1 | 0 | 6.535672  | -2.304892 | 2.742956  |
| 71 | 6 | 0 | 9.116208  | -4.868207 | 1.408442  |
| 72 | 1 | 0 | 9.539500  | -3.411142 | -0.123914 |
| 73 | 6 | 0 | 11.229717 | 0.119167  | 0.717092  |
| 74 | 1 | 0 | 10.000717 | -1.000623 | 2.090916  |
| 75 | 6 | 0 | 10.273786 | 0.528231  | -1.458907 |
| 76 | 1 | 0 | 8.316157  | -0.308919 | -1.801343 |
| 77 | 6 | 0 | 8.347412  | -5.182582 | 2.531134  |
| 78 | 1 | 0 | 6.815525  | -4.485335 | 3.880287  |
| 79 | 1 | 0 | 9.843724  | -5.580298 | 1.029435  |
| 80 | 6 | 0 | 11.330634 | 0.679130  | -0.558302 |
| 81 | 1 | 0 | 12.042718 | 0.233556  | 1.428363  |
| 82 | 1 | 0 | 10.343466 | 0.951303  | -2.456945 |
| 83 | 1 | 0 | 8.476538  | -6.135808 | 3.034578  |
| 84 | 1 | 0 | 12.222955 | 1.225773  | -0.847647 |
| 85 | 6 | 0 | -2.483070 | 2.744188  | -0.363724 |
| 86 | 6 | 0 | -2.906761 | 4.148575  | -0.557428 |
| 87 | 6 | 0 | -2.346662 | 2.341796  | 1.055617  |
| 88 | 6 | 0 | -3.143229 | 4.979029  | 0.481175  |
| 89 | 1 | 0 | -3.026543 | 4.531391  | -1.560717 |
| 90 | 6 | 0 | -2.586295 | 3.179109  | 2.083041  |
| 91 | 1 | 0 | -2.037780 | 1.321761  | 1.257832  |
| 92 | 1 | 0 | -3.448349 | 6.002975  | 0.290870  |
| 93 | 1 | 0 | -2.469892 | 2.834820  | 3.105465  |
| 94 | 6 | 0 | -3.002416 | 4.550704  | 1.858299  |
| 95 | 6 | 0 | -3.252773 | 5.408446  | 2.917992  |
| 96 | 6 | 0 | -3.115710 | 4.980699  | 4.273592  |
| 97 | 6 | 0 | -3.662392 | 6.760376  | 2.710140  |
| 98 | 7 | 0 | -3.000511 | 4.614814  | 5.373545  |
| 99 | 7 | 0 | -3.997310 | 7.861408  | 2.530526  |

-----  
Total energy (Sum of electronic and zero-point energies): -2990.4359033  
Hartree

## **BTD 11**

Standard orientation:

| Center<br>Number | Atomic<br>Number | Atomic<br>Type | Coordinates (Angstroms) |           |           |
|------------------|------------------|----------------|-------------------------|-----------|-----------|
|                  |                  |                | X                       | Y         | Z         |
| 1                | 16               | 0              | -2.025744               | -2.250719 | -2.267089 |
| 2                | 7                | 0              | -2.320749               | -1.857950 | -0.703650 |
| 3                | 7                | 0              | -0.389674               | -2.353001 | -2.232789 |
| 4                | 6                | 0              | -1.132525               | -1.801441 | -0.094344 |
| 5                | 6                | 0              | -0.019615               | -2.080111 | -0.977320 |
| 6                | 6                | 0              | 1.327594                | -2.024704 | -0.494027 |
| 7                | 6                | 0              | 1.511632                | -1.702117 | 0.834297  |
| 8                | 1                | 0              | 2.514563                | -1.640085 | 1.241369  |
| 9                | 6                | 0              | 0.414509                | -1.453994 | 1.708002  |
| 10               | 1                | 0              | 0.630783                | -1.219905 | 2.745774  |
| 11               | 6                | 0              | -0.897784               | -1.498090 | 1.285099  |
| 12               | 6                | 0              | 2.434427                | -2.316215 | -1.420110 |
| 13               | 6                | 0              | 3.817184                | -1.873273 | -1.711646 |
| 14               | 6                | 0              | 2.721963                | -1.743150 | -2.796602 |
| 15               | 6                | 0              | 3.581093                | -3.335642 | -1.347084 |
| 16               | 6                | 0              | 2.686203                | -2.499772 | -4.041532 |
| 17               | 6                | 0              | 2.242794                | -0.381617 | -2.988044 |
| 18               | 6                | 0              | 3.739913                | -4.470462 | -2.249387 |
| 19               | 6                | 0              | 3.988325                | -3.678776 | 0.009571  |
| 20               | 7                | 0              | 2.652649                | -3.032266 | -5.072158 |
| 21               | 7                | 0              | 1.863415                | 0.704661  | -3.138959 |
| 22               | 7                | 0              | 3.901141                | -5.419557 | -2.897655 |
| 23               | 7                | 0              | 4.300371                | -3.955470 | 1.092512  |
| 24               | 6                | 0              | 4.837779                | -0.941165 | -1.210077 |
| 25               | 6                | 0              | 4.500657                | 0.316686  | -0.682494 |
| 26               | 6                | 0              | 6.193459                | -1.302331 | -1.271087 |
| 27               | 6                | 0              | 5.485448                | 1.181800  | -0.228137 |
| 28               | 1                | 0              | 3.461055                | 0.620293  | -0.615421 |
| 29               | 6                | 0              | 7.182700                | -0.439968 | -0.821985 |
| 30               | 1                | 0              | 6.478039                | -2.264024 | -1.688399 |
| 31               | 6                | 0              | 6.848955                | 0.823137  | -0.289313 |
| 32               | 1                | 0              | 5.201689                | 2.140675  | 0.188984  |
| 33               | 1                | 0              | 8.222706                | -0.736281 | -0.888681 |
| 34               | 7                | 0              | 7.844023                | 1.697534  | 0.169343  |
| 35               | 6                | 0              | 9.085823                | 1.198110  | 0.672316  |
| 36               | 6                | 0              | 10.294970               | 1.748891  | 0.225036  |
| 37               | 6                | 0              | 9.107044                | 0.174157  | 1.630759  |
| 38               | 6                | 0              | 11.506175               | 1.280748  | 0.732441  |

|    |   |   |            |           |           |
|----|---|---|------------|-----------|-----------|
| 39 | 1 | 0 | 10.277534  | 2.542138  | -0.515253 |
| 40 | 6 | 0 | 10.323535  | -0.299699 | 2.119949  |
| 41 | 1 | 0 | 8.171642   | -0.244779 | 1.987677  |
| 42 | 6 | 0 | 11.527548  | 0.252448  | 1.677071  |
| 43 | 1 | 0 | 12.436572  | 1.715329  | 0.378651  |
| 44 | 1 | 0 | 10.327492  | -1.093506 | 2.861215  |
| 45 | 1 | 0 | 12.472715  | -0.113865 | 2.065860  |
| 46 | 6 | 0 | 7.642106   | 3.113013  | 0.149294  |
| 47 | 6 | 0 | 7.928591   | 3.878185  | 1.288533  |
| 48 | 6 | 0 | 7.178338   | 3.750129  | -1.011072 |
| 49 | 6 | 0 | 7.754015   | 5.261120  | 1.263329  |
| 50 | 1 | 0 | 8.287724   | 3.384581  | 2.185724  |
| 51 | 6 | 0 | 6.989745   | 5.131401  | -1.021641 |
| 52 | 1 | 0 | 6.967688   | 3.160443  | -1.897473 |
| 53 | 6 | 0 | 7.279612   | 5.893645  | 0.112202  |
| 54 | 1 | 0 | 7.979104   | 5.843707  | 2.151911  |
| 55 | 1 | 0 | 6.628372   | 5.613486  | -1.925293 |
| 56 | 1 | 0 | 7.138464   | 6.970000  | 0.098103  |
| 57 | 6 | 0 | -1.989823  | -1.241684 | 2.242182  |
| 58 | 6 | 0 | -3.364580  | -0.710804 | 2.360423  |
| 59 | 6 | 0 | -2.210554  | -0.026401 | 3.134981  |
| 60 | 6 | 0 | -3.097766  | -2.142732 | 2.811157  |
| 61 | 6 | 0 | -4.491620  | -0.161341 | 1.593662  |
| 62 | 6 | 0 | -2.057050  | -0.006183 | 4.584137  |
| 63 | 6 | 0 | -1.768741  | 1.228293  | 2.543474  |
| 64 | 6 | 0 | -3.137024  | -2.608900 | 4.193723  |
| 65 | 6 | 0 | -3.594672  | -3.178265 | 1.912999  |
| 66 | 6 | 0 | -4.309706  | 0.692699  | 0.493988  |
| 67 | 6 | 0 | -5.800448  | -0.463562 | 2.000929  |
| 68 | 7 | 0 | -1.906060  | 0.095084  | 5.730822  |
| 69 | 7 | 0 | -1.406925  | 2.227106  | 2.075978  |
| 70 | 7 | 0 | -3.199871  | -3.055892 | 5.263112  |
| 71 | 7 | 0 | -3.994684  | -4.043445 | 1.251760  |
| 72 | 6 | 0 | -5.401159  | 1.226498  | -0.174501 |
| 73 | 1 | 0 | -3.310597  | 0.927535  | 0.144402  |
| 74 | 6 | 0 | -6.896376  | 0.070328  | 1.338253  |
| 75 | 1 | 0 | -5.964429  | -1.111389 | 2.857348  |
| 76 | 6 | 0 | -6.718727  | 0.931052  | 0.235825  |
| 77 | 1 | 0 | -5.239410  | 1.870006  | -1.031180 |
| 78 | 1 | 0 | -7.896867  | -0.169470 | 1.677808  |
| 79 | 7 | 0 | -7.821239  | 1.477332  | -0.438723 |
| 80 | 6 | 0 | -9.075247  | 0.791701  | -0.467636 |
| 81 | 6 | 0 | -7.725877  | 2.743632  | -1.094449 |
| 82 | 6 | 0 | -10.257470 | 1.477854  | -0.155731 |
| 83 | 6 | 0 | -9.138656  | -0.562950 | -0.826306 |
| 84 | 6 | 0 | -8.220874  | 2.897103  | -2.397414 |
| 85 | 6 | 0 | -7.159496  | 3.846748  | -0.438401 |
| 86 | 6 | 0 | -11.483561 | 0.816195  | -0.204848 |
| 87 | 1 | 0 | -10.208160 | 2.525926  | 0.121102  |
| 88 | 6 | 0 | -10.367215 | -1.221327 | -0.855508 |
| 89 | 1 | 0 | -8.225769  | -1.092500 | -1.079598 |
| 90 | 6 | 0 | -8.149549  | 4.136887  | -3.030830 |
| 91 | 1 | 0 | -8.660395  | 2.044243  | -2.904293 |

|     |   |   |            |           |           |
|-----|---|---|------------|-----------|-----------|
| 92  | 6 | 0 | -7.076137  | 5.078340  | -1.086232 |
| 93  | 1 | 0 | -6.787273  | 3.733739  | 0.574662  |
| 94  | 6 | 0 | -11.544895 | -0.535795 | -0.549066 |
| 95  | 1 | 0 | -12.392631 | 1.358410  | 0.038728  |
| 96  | 1 | 0 | -10.403452 | -2.270659 | -1.133468 |
| 97  | 6 | 0 | -7.573003  | 5.231181  | -2.382473 |
| 98  | 1 | 0 | -8.536320  | 4.243279  | -4.040203 |
| 99  | 1 | 0 | -6.633867  | 5.924381  | -0.568287 |
| 100 | 1 | 0 | -12.500696 | -1.049788 | -0.580114 |
| 101 | 1 | 0 | -7.513060  | 6.193565  | -2.881397 |

-----  
Total energy (Sum of electronic and zero-point energies): -3283.0554384  
Hartree

## **BTD 12**

Standard orientation:

| Center<br>Number | Atomic<br>Number | Atomic<br>Type | Coordinates (Angstroms) |           |           |
|------------------|------------------|----------------|-------------------------|-----------|-----------|
|                  |                  |                | X                       | Y         | Z         |
| 1                | 16               | 0              | 1.945826                | 0.937522  | -2.871535 |
| 2                | 7                | 0              | 2.331070                | 0.781023  | -1.282727 |
| 3                | 7                | 0              | 0.313842                | 0.832943  | -2.776291 |
| 4                | 6                | 0              | 1.179108                | 0.640315  | -0.616685 |
| 5                | 6                | 0              | 0.016485                | 0.666536  | -1.483512 |
| 6                | 6                | 0              | -1.305805               | 0.499768  | -0.957726 |
| 7                | 6                | 0              | -1.411916               | 0.309205  | 0.402767  |
| 8                | 1                | 0              | -2.386932               | 0.143631  | 0.848481  |
| 9                | 6                | 0              | -0.273210               | 0.297805  | 1.257507  |
| 10               | 1                | 0              | -0.436930               | 0.143048  | 2.319584  |
| 11               | 6                | 0              | 1.019545                | 0.458639  | 0.798460  |
| 12               | 6                | 0              | -2.447361               | 0.540230  | -1.887326 |
| 13               | 6                | 0              | -3.848457               | 0.109481  | -1.985472 |
| 14               | 6                | 0              | -2.802481               | -0.472821 | -2.968652 |
| 15               | 6                | 0              | -2.761703               | -0.249057 | -4.407761 |
| 16               | 6                | 0              | -2.390140               | -1.834640 | -2.658356 |
| 17               | 7                | 0              | -2.734224               | -0.129536 | -5.562733 |
| 18               | 7                | 0              | -2.055640               | -2.919098 | -2.413815 |
| 19               | 6                | 0              | -4.901523               | -0.556487 | -1.196373 |
| 20               | 6                | 0              | -4.630297               | -1.605613 | -0.301241 |
| 21               | 6                | 0              | -6.236071               | -0.150225 | -1.357897 |
| 22               | 6                | 0              | -5.653229               | -2.219868 | 0.408491  |
| 23               | 1                | 0              | -3.611353               | -1.947860 | -0.153254 |

|    |   |   |            |           |           |
|----|---|---|------------|-----------|-----------|
| 24 | 6 | 0 | -7.265088  | -0.765016 | -0.658241 |
| 25 | 1 | 0 | -6.471538  | 0.650047  | -2.053431 |
| 26 | 6 | 0 | -6.995011  | -1.817070 | 0.241614  |
| 27 | 1 | 0 | -5.415714  | -3.017648 | 1.102263  |
| 28 | 1 | 0 | -8.287170  | -0.439974 | -0.812383 |
| 29 | 7 | 0 | -8.028645  | -2.446784 | 0.950773  |
| 30 | 6 | 0 | -9.242305  | -1.754461 | 1.252700  |
| 31 | 6 | 0 | -10.478838 | -2.356814 | 0.981017  |
| 32 | 6 | 0 | -9.210901  | -0.481690 | 1.841551  |
| 33 | 6 | 0 | -11.664055 | -1.693728 | 1.295851  |
| 34 | 1 | 0 | -10.502770 | -3.342128 | 0.527020  |
| 35 | 6 | 0 | -10.400919 | 0.181784  | 2.137136  |
| 36 | 1 | 0 | -8.254675  | -0.019533 | 2.065162  |
| 37 | 6 | 0 | -11.632099 | -0.421111 | 1.869866  |
| 38 | 1 | 0 | -12.615773 | -2.170783 | 1.080700  |
| 39 | 1 | 0 | -10.363988 | 1.167369  | 2.592096  |
| 40 | 1 | 0 | -12.556841 | 0.095156  | 2.108473  |
| 41 | 6 | 0 | -7.906021  | -3.808505 | 1.370224  |
| 42 | 6 | 0 | -8.219494  | -4.164836 | 2.689406  |
| 43 | 6 | 0 | -7.494722  | -4.799865 | 0.467251  |
| 44 | 6 | 0 | -8.122788  | -5.494888 | 3.095989  |
| 45 | 1 | 0 | -8.539455  | -3.397343 | 3.386748  |
| 46 | 6 | 0 | -7.383557  | -6.124615 | 0.887208  |
| 47 | 1 | 0 | -7.263165  | -4.528094 | -0.557584 |
| 48 | 6 | 0 | -7.699729  | -6.479440 | 2.200506  |
| 49 | 1 | 0 | -8.368602  | -5.759069 | 4.120416  |
| 50 | 1 | 0 | -7.061926  | -6.883209 | 0.179638  |
| 51 | 1 | 0 | -7.618813  | -7.513210 | 2.522088  |
| 52 | 6 | 0 | 2.130451   | 0.417698  | 1.769830  |
| 53 | 6 | 0 | 3.526570   | -0.001070 | 1.966923  |
| 54 | 6 | 0 | 2.405555   | -0.702443 | 2.771204  |
| 55 | 6 | 0 | 4.682424   | -0.578215 | 1.257987  |
| 56 | 6 | 0 | 2.205436   | -0.640540 | 4.213411  |
| 57 | 6 | 0 | 2.069725   | -2.031189 | 2.277869  |
| 58 | 6 | 0 | 4.546234   | -1.488912 | 0.197973  |
| 59 | 6 | 0 | 5.976260   | -0.235051 | 1.681642  |
| 60 | 7 | 0 | 2.028233   | -0.648740 | 5.361672  |
| 61 | 7 | 0 | 1.792347   | -3.090900 | 1.893414  |
| 62 | 6 | 0 | 5.663985   | -2.037275 | -0.415215 |
| 63 | 1 | 0 | 3.560650   | -1.758868 | -0.164486 |
| 64 | 6 | 0 | 7.098644   | -0.784833 | 1.077963  |
| 65 | 1 | 0 | 6.103872   | 0.460585  | 2.506102  |
| 66 | 6 | 0 | 6.964494   | -1.702214 | 0.015734  |
| 67 | 1 | 0 | 5.535283   | -2.726185 | -1.241798 |
| 68 | 1 | 0 | 8.086237   | -0.514140 | 1.432367  |
| 69 | 7 | 0 | 8.094143   | -2.266155 | -0.599665 |
| 70 | 6 | 0 | 9.335332   | -1.559710 | -0.640323 |
| 71 | 6 | 0 | 8.035007   | -3.569705 | -1.182315 |
| 72 | 6 | 0 | 10.524674  | -2.207428 | -0.276679 |
| 73 | 6 | 0 | 9.381852   | -0.222707 | -1.062807 |
| 74 | 6 | 0 | 8.566153   | -3.790916 | -2.461188 |
| 75 | 6 | 0 | 7.467308   | -4.641923 | -0.477837 |
| 76 | 6 | 0 | 11.739275  | -1.525904 | -0.337460 |



|     |   |   |           |           |           |
|-----|---|---|-----------|-----------|-----------|
| 77  | 1 | 0 | 10.489927 | -3.241903 | 0.049020  |
| 78  | 6 | 0 | 10.598539 | 0.456667  | -1.103557 |
| 79  | 1 | 0 | 8.464359  | 0.276529  | -1.357492 |
| 80  | 6 | 0 | 8.529844  | -5.066469 | -3.022469 |
| 81  | 1 | 0 | 9.006476  | -2.962223 | -3.006097 |
| 82  | 6 | 0 | 7.418799  | -5.910190 | -1.054495 |
| 83  | 1 | 0 | 7.066170  | -4.476390 | 0.516804  |
| 84  | 6 | 0 | 11.782942 | -0.190968 | -0.745121 |
| 85  | 1 | 0 | 12.653450 | -2.038987 | -0.053237 |
| 86  | 1 | 0 | 10.620957 | 1.491853  | -1.431696 |
| 87  | 6 | 0 | 7.952202  | -6.130366 | -2.326310 |
| 88  | 1 | 0 | 8.944724  | -5.225081 | -4.013683 |
| 89  | 1 | 0 | 6.974739  | -6.731443 | -0.499528 |
| 90  | 1 | 0 | 12.729807 | 0.338638  | -0.785119 |
| 91  | 1 | 0 | 7.919382  | -7.120943 | -2.769434 |
| 92  | 6 | 0 | 3.184240  | 1.473097  | 2.243724  |
| 93  | 6 | 0 | 3.140679  | 2.111541  | 3.580268  |
| 94  | 6 | 0 | 3.655539  | 2.364817  | 1.157418  |
| 95  | 6 | 0 | 3.482414  | 3.403269  | 3.771443  |
| 96  | 1 | 0 | 2.820619  | 1.534723  | 4.436034  |
| 97  | 6 | 0 | 3.995994  | 3.652035  | 1.366019  |
| 98  | 1 | 0 | 3.723887  | 1.936730  | 0.163734  |
| 99  | 1 | 0 | 3.430895  | 3.829944  | 4.768094  |
| 100 | 1 | 0 | 4.339094  | 4.262900  | 0.537263  |
| 101 | 6 | 0 | 3.927283  | 4.252902  | 2.683875  |
| 102 | 6 | 0 | 4.278364  | 5.576383  | 2.894324  |
| 103 | 6 | 0 | 4.218419  | 6.171913  | 4.190924  |
| 104 | 6 | 0 | 4.721923  | 6.410709  | 1.823349  |
| 105 | 7 | 0 | 5.083383  | 7.076385  | 0.938581  |
| 106 | 7 | 0 | 4.165798  | 6.645247  | 5.253774  |
| 107 | 6 | 0 | -3.546635 | 1.614627  | -2.130290 |
| 108 | 6 | 0 | -3.894282 | 2.373308  | -0.904900 |
| 109 | 6 | 0 | -3.660633 | 2.400034  | -3.381148 |
| 110 | 6 | 0 | -4.273460 | 3.665284  | -0.923977 |
| 111 | 1 | 0 | -3.847808 | 1.846428  | 0.041852  |
| 112 | 6 | 0 | -4.039595 | 3.695608  | -3.386333 |
| 113 | 1 | 0 | -3.426711 | 1.928087  | -4.324461 |
| 114 | 1 | 0 | -4.520633 | 4.174096  | 0.002055  |
| 115 | 1 | 0 | -4.104532 | 4.231716  | -4.327686 |
| 116 | 6 | 0 | -4.369372 | 4.407622  | -2.167460 |
| 117 | 6 | 0 | -4.762948 | 5.735223  | -2.183191 |
| 118 | 6 | 0 | -5.092470 | 6.430920  | -0.979959 |
| 119 | 6 | 0 | -4.863883 | 6.474079  | -3.401245 |
| 120 | 7 | 0 | -5.359699 | 6.980578  | 0.011472  |
| 121 | 7 | 0 | -4.943838 | 7.066014  | -4.400956 |

-----  
Total energy (Sum of electronic and zero-point energies): -3745.1304756  
Hartree

## TD-DFT Data of BTD 7

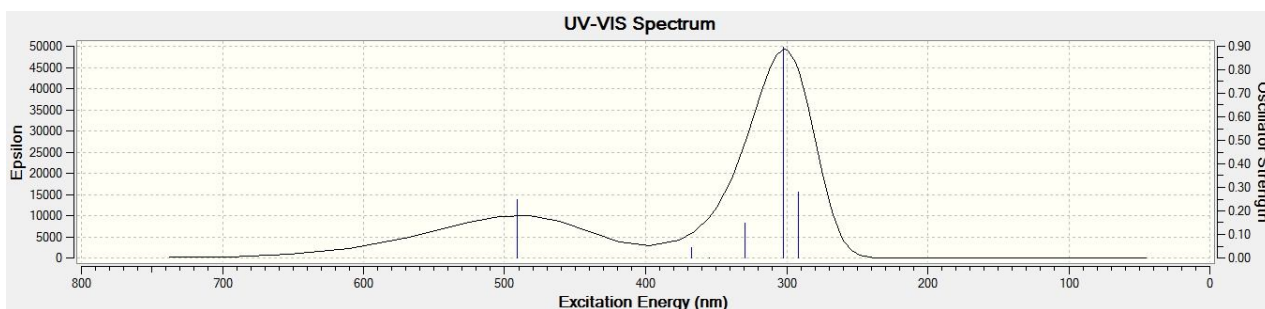

**Fig S30.** Simulated UV-visible optical absorption spectra of BTD 7 at the TDDFT/CAM-B3LYP/6-31G\*\* level for C, N, H, and S in dichloromethane.

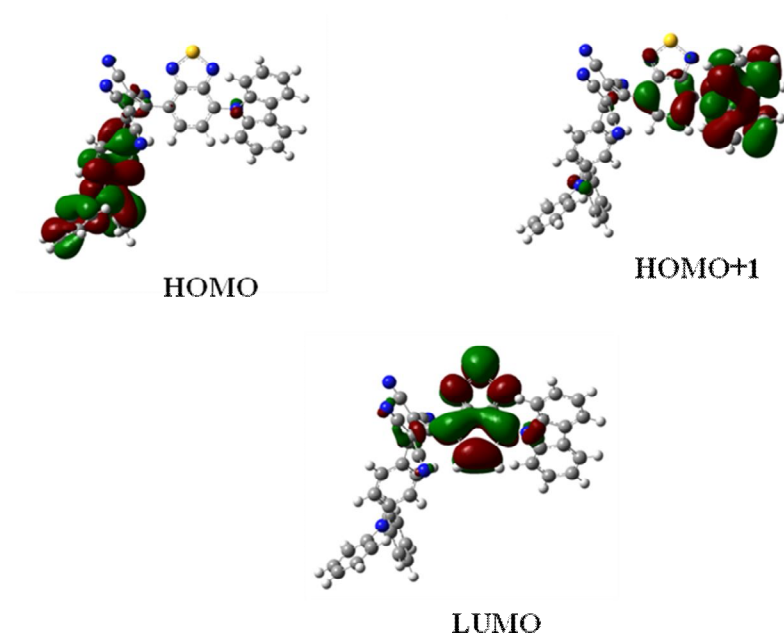

**Fig S31.** Frontier molecular orbitals of BTD 7 at the TDDFT/CAM-B3LYP/6-31G\*\* level for C, N, H, and S in dichloromethane

### Chart 1. Excitation energies and oscillator strengths:

Excited State 1: Singlet-A 2.5254 eV 490.95 nm  
f=0.2481 <S\*\*2>=0.000

179 ->181 0.66788  
180 ->181 -0.17618

This state for optimization and/or second-order correction.  
Copying the excited state density for this state as the 1-  
particle RhoCI density.

Excited State 2: Singlet-A 3.3764 eV 367.21 nm  
f=0.0451 <S\*\*2>=0.000

177 ->181 -0.16496  
179 ->181 -0.19166  
180 ->181 -0.64967

Excited State 3: Singlet-A 3.4931 eV 354.94 nm  
f=0.0007 <S\*\*2>=0.000

178 ->181 0.69689

Excited State 4: Singlet-A 3.7605 eV 329.70 nm  
f=0.1491 <S\*\*2>=0.000

172 ->181 -0.13477  
176 ->181 0.23279  
177 ->181 0.60248  
180 ->181 -0.17312

Excited State 5: Singlet-A 4.1010 eV 302.32 nm  
f=0.8975 <S\*\*2>=0.000

180 ->182 0.45291  
180 ->183 -0.26889  
180 ->184 -0.35794  
180 ->185 0.13485  
180 ->187 0.12912  
180 ->195 0.10082

Excited State 6: Singlet-A 4.2506 eV 291.68 nm  
f=0.2806 <S\*\*2>=0.000

170 ->181 0.65393  
174 ->181 -0.12256

## Standard orientation:

| Center<br>Number | Atomic<br>Number | Atomic<br>Type | Coordinates (Angstroms) |           |           |
|------------------|------------------|----------------|-------------------------|-----------|-----------|
|                  |                  |                | X                       | Y         | Z         |
| 1                | 16               | 0              | 4.508267                | -2.510826 | 2.063596  |
| 2                | 7                | 0              | 4.923280                | -1.101329 | 1.259405  |
| 3                | 7                | 0              | 2.951120                | -2.683322 | 1.475133  |
| 4                | 6                | 0              | 3.865657                | -0.758237 | 0.534917  |
| 5                | 6                | 0              | 2.738169                | -1.662153 | 0.655805  |
| 6                | 6                | 0              | 1.539009                | -1.396389 | -0.060104 |
| 7                | 6                | 0              | 1.457246                | -0.248080 | -0.866009 |
| 8                | 1                | 0              | 0.547397                | -0.045151 | -1.418347 |
| 9                | 6                | 0              | 2.517551                | 0.631932  | -0.975965 |
| 10               | 1                | 0              | 2.445203                | 1.491573  | -1.630288 |
| 11               | 6                | 0              | 3.730315                | 0.385655  | -0.293620 |
| 12               | 6                | 0              | 0.445976                | -2.351908 | 0.063192  |
| 13               | 6                | 0              | -1.021119               | -2.427288 | 0.146960  |
| 14               | 6                | 0              | -0.170814               | -2.929831 | 1.313839  |
| 15               | 6                | 0              | -0.332162               | -3.193308 | -0.963272 |
| 16               | 6                | 0              | -0.058324               | -4.319028 | 1.736075  |
| 17               | 6                | 0              | -0.146275               | -2.030238 | 2.457177  |
| 18               | 6                | 0              | -0.270184               | -4.643811 | -1.072161 |
| 19               | 6                | 0              | -0.442309               | -2.573264 | -2.273779 |
| 20               | 7                | 0              | 0.020583                | -5.400839 | 2.130351  |
| 21               | 7                | 0              | -0.144889               | -1.322500 | 3.368566  |
| 22               | 7                | 0              | -0.216725               | -5.787043 | -1.224575 |
| 23               | 7                | 0              | -0.525098               | -2.087592 | -3.317522 |
| 24               | 7                | 0              | 4.791346                | 1.288063  | -0.428725 |
| 25               | 6                | 0              | 4.690670                | 2.667693  | -0.229484 |
| 26               | 6                | 0              | 6.095437                | 0.984996  | -0.803591 |
| 27               | 6                | 0              | 3.590488                | 3.398989  | 0.206816  |
| 28               | 6                | 0              | 5.942522                | 3.262593  | -0.487087 |
| 29               | 6                | 0              | 6.633610                | -0.252684 | -1.152584 |
| 30               | 6                | 0              | 6.848984                | 2.178819  | -0.856279 |
| 31               | 6                | 0              | 3.757401                | 4.775465  | 0.338701  |
| 32               | 1                | 0              | 2.649613                | 2.920195  | 0.444840  |
| 33               | 6                | 0              | 6.090880                | 4.626762  | -0.339943 |
| 34               | 6                | 0              | 7.972047                | -0.277261 | -1.531511 |
| 35               | 1                | 0              | 6.038623                | -1.154301 | -1.125049 |
| 36               | 6                | 0              | 8.173163                | 2.132825  | -1.238188 |
| 37               | 6                | 0              | 4.982411                | 5.380113  | 0.067470  |
| 38               | 1                | 0              | 2.921696                | 5.380921  | 0.669483  |
| 39               | 1                | 0              | 7.043738                | 5.109074  | -0.526753 |
| 40               | 6                | 0              | 8.731437                | 0.890193  | -1.568645 |
| 41               | 1                | 0              | 8.428006                | -1.221846 | -1.803913 |
| 42               | 1                | 0              | 8.771423                | 3.035294  | -1.293366 |
| 43               | 1                | 0              | 5.085175                | 6.452799  | 0.185439  |
| 44               | 1                | 0              | 9.772112                | 0.839949  | -1.867973 |
| 45               | 6                | 0              | -2.199480               | -1.549986 | 0.094610  |
| 46               | 6                | 0              | -2.131327               | -0.218041 | 0.509749  |
| 47               | 6                | 0              | -3.418835               | -2.050761 | -0.366100 |
| 48               | 6                | 0              | -3.251788               | 0.591921  | 0.466665  |

|    |   |   |            |           |           |
|----|---|---|------------|-----------|-----------|
| 49 | 1 | 0 | -1.190444  | 0.197946  | 0.853749  |
| 50 | 6 | 0 | -4.543385  | -1.247029 | -0.406813 |
| 51 | 1 | 0 | -3.492766  | -3.085583 | -0.684308 |
| 52 | 6 | 0 | -4.480820  | 0.091487  | 0.010444  |
| 53 | 1 | 0 | -3.174967  | 1.626272  | 0.777213  |
| 54 | 1 | 0 | -5.482076  | -1.657828 | -0.756601 |
| 55 | 7 | 0 | -5.615716  | 0.909137  | -0.030645 |
| 56 | 6 | 0 | -6.647695  | 0.680278  | -0.985088 |
| 57 | 6 | 0 | -7.981380  | 0.649622  | -0.575693 |
| 58 | 6 | 0 | -6.339459  | 0.508358  | -2.335866 |
| 59 | 6 | 0 | -8.992167  | 0.452868  | -1.508085 |
| 60 | 1 | 0 | -8.219659  | 0.782922  | 0.473822  |
| 61 | 6 | 0 | -7.354160  | 0.293689  | -3.259758 |
| 62 | 1 | 0 | -5.304158  | 0.543539  | -2.656941 |
| 63 | 6 | 0 | -8.684185  | 0.268948  | -2.852127 |
| 64 | 1 | 0 | -10.025721 | 0.432313  | -1.178347 |
| 65 | 1 | 0 | -7.102623  | 0.159560  | -4.306701 |
| 66 | 1 | 0 | -9.474952  | 0.109066  | -3.577144 |
| 67 | 6 | 0 | -5.767474  | 1.993417  | 0.880299  |
| 68 | 6 | 0 | -6.134792  | 3.254223  | 0.408317  |
| 69 | 6 | 0 | -5.572918  | 1.802142  | 2.249500  |
| 70 | 6 | 0 | -6.308194  | 4.307752  | 1.297013  |
| 71 | 1 | 0 | -6.285148  | 3.401784  | -0.655488 |
| 72 | 6 | 0 | -5.730007  | 2.864730  | 3.130125  |
| 73 | 1 | 0 | -5.298758  | 0.819987  | 2.618732  |
| 74 | 6 | 0 | -6.101933  | 4.120260  | 2.659872  |
| 75 | 1 | 0 | -6.595556  | 5.283292  | 0.918675  |
| 76 | 1 | 0 | -5.574594  | 2.704780  | 4.192007  |
| 77 | 1 | 0 | -6.231875  | 4.946049  | 3.351043  |

-----  
Total energy (Sum of electronic and zero-point energies): -2526.064  
5628 Hartree
